# Supplementary material for: Retracted article: Enantioselectivity of aza-MBH-type reaction of nitroalkene to N-tosylimine catalyzed by thiourea-tertiary amine: a theoretical study
Source: Royal Society of Chemistry journal article supplement (doi:10.1039/c1ra00015b), 2011-01-01
Supplement: c1ra00015b.pdf [file c1ra00015b.pdf]

Retraction for *RSC Advances*:

---

**Enantioselectivity of aza-MBH-type reaction of nitroalkene to *N*-tosylimine catalyzed by thiourea-tertiary amine: a theoretical study**

Nan Lu, Lin Meng, Dezhan Chen and Guiqiu Zhang

*RSC Adv.*, 2011, **1**, 1113–1118 (DOI: 10.1039/C1RA00015B). **Retraction published 1st February 2012**

---

We, the named authors, hereby wholly retract this RSC Advances article.

Signed: Nan Lu, Lin Meng, Dezhan Chen and Guiqiu Zhang, China, February 2012

Retraction endorsed by Sarah Ruthven, Managing Editor.

---
