# Supplementary material for: Retracted article: Enantioselectivity of aza-MBH-type reaction of nitroalkene to N-tosylimine catalyzed by thiourea-tertiary amine: a theoretical study
Source: Royal Society of Chemistry journal article supplement (doi:10.1039/c1ra00015b), 2011-01-01
Supplement: c1ra00015b_esi.pdf [file c1ra00015b_esi.pdf]

*Supplementary data*

**Enantioselectivity of aza-MBH-type reaction of nitroalkene to  
N-tosylimine catalyzed by thiourea-tertiary amine: a theoretical  
study**

Nan Lu, Lin Meng, Dezhan Chen\*, Guiqiu Zhang

*College of Chemistry, Chemical Engineering and Materials Science, Shandong  
Normal University, Jinan 250014, P. R. China*

| Contents | Page |
|----------|------|
| Figure 1 | S4   |
| Figure 2 | S6   |
| Table 1  | S7   |
| Table 2  | S8   |
| Table 3  | S9   |
| Table 4  | S11  |
| Table 5  | S12  |
| Table 6  | S14  |
| Table 7  | S15  |
| Table 8  | S16  |
| Table 9  | S18  |
| Table 10 | S19  |
| Table 11 | S21  |
| Table 12 | S23  |
| Table 13 | S25  |
| Table 14 | S27  |
| Table 15 | S29  |
| Table 16 | S31  |
| Table 17 | S33  |
| Table 18 | S35  |
| Table 19 | S37  |

Table 20

S39

**Figure 1.** Optimized structure and selected geometric parameters of species with catalyst model 4 and of Ints with full catalyst 5.

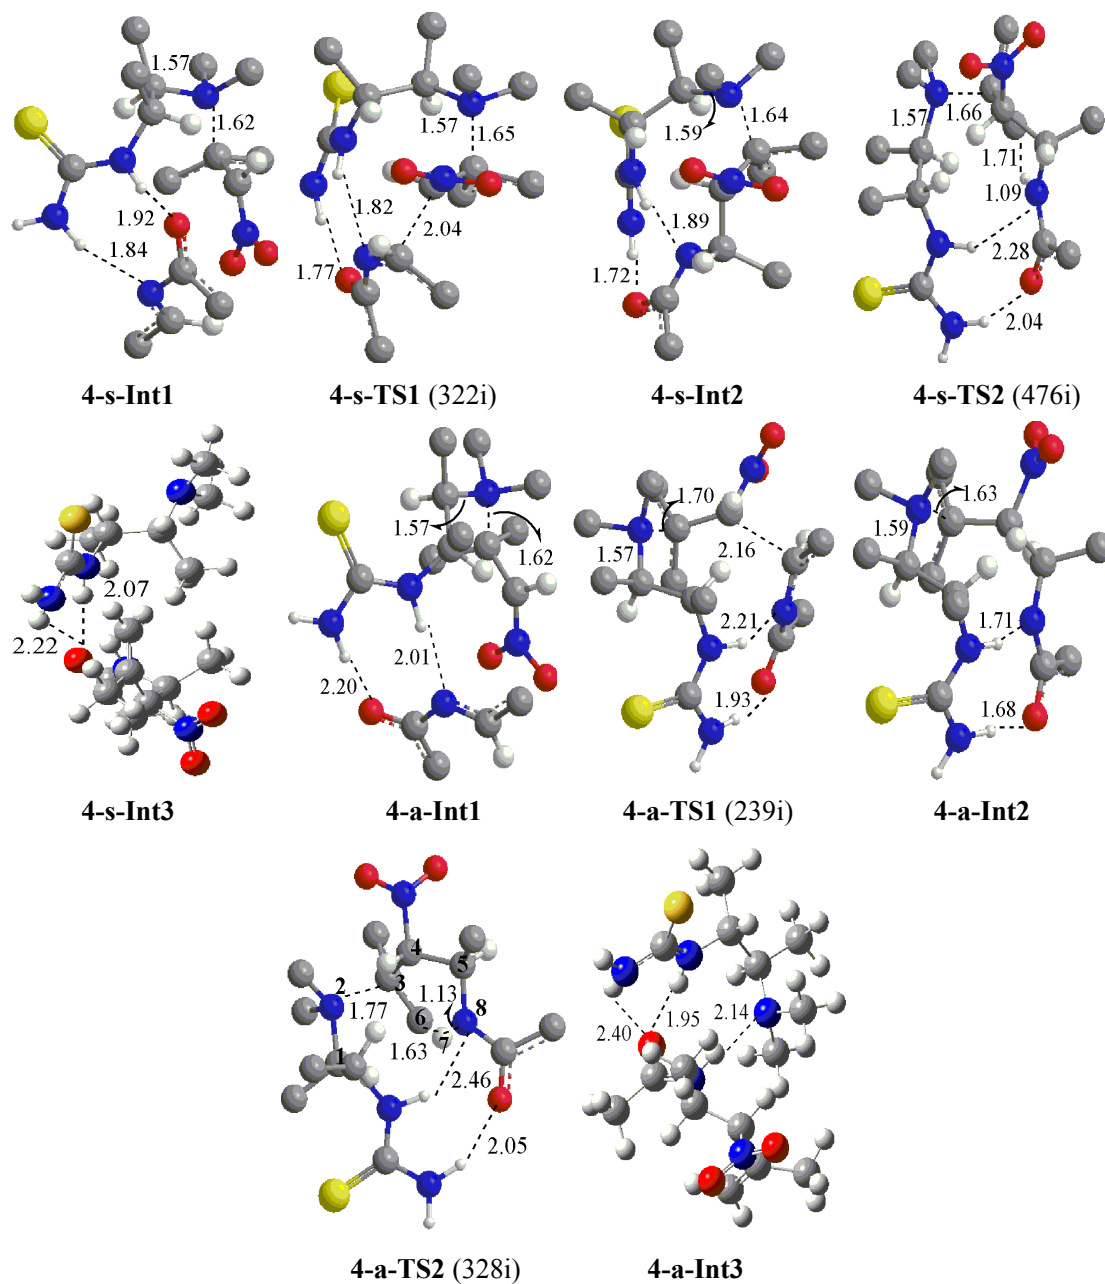

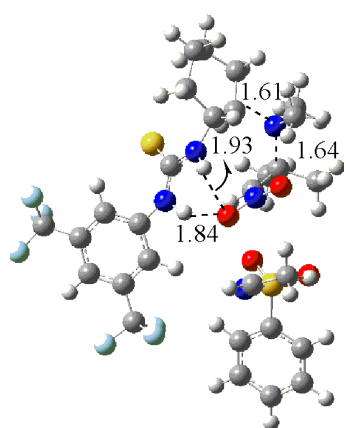

**5-s-Int1**

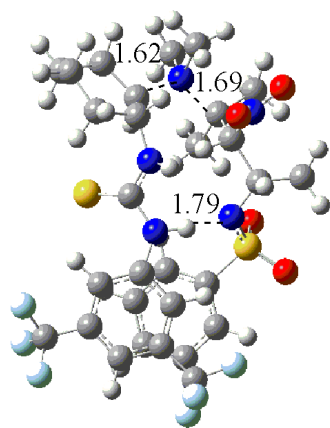

**5-s-Int2**

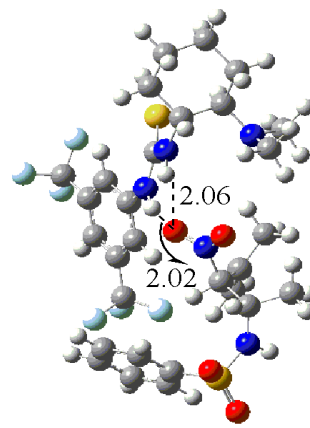

**5-s-Int3**

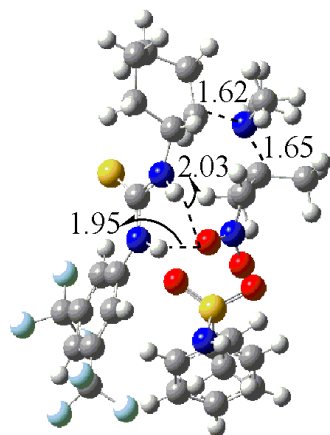

**5-a-Int1**

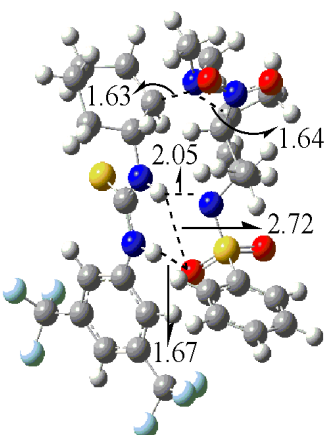

**5-a-Int2**

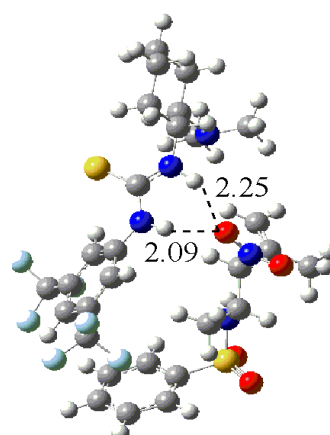

**5-a-Int3**

**Figure 2.** The  $\pi$ - $\pi$  aromatic stacking interaction of related species in two steps of the aza-MBH-type reaction with full catalyst **5**. The approximate angles between two planes of aromatic ring are given in *italic*.

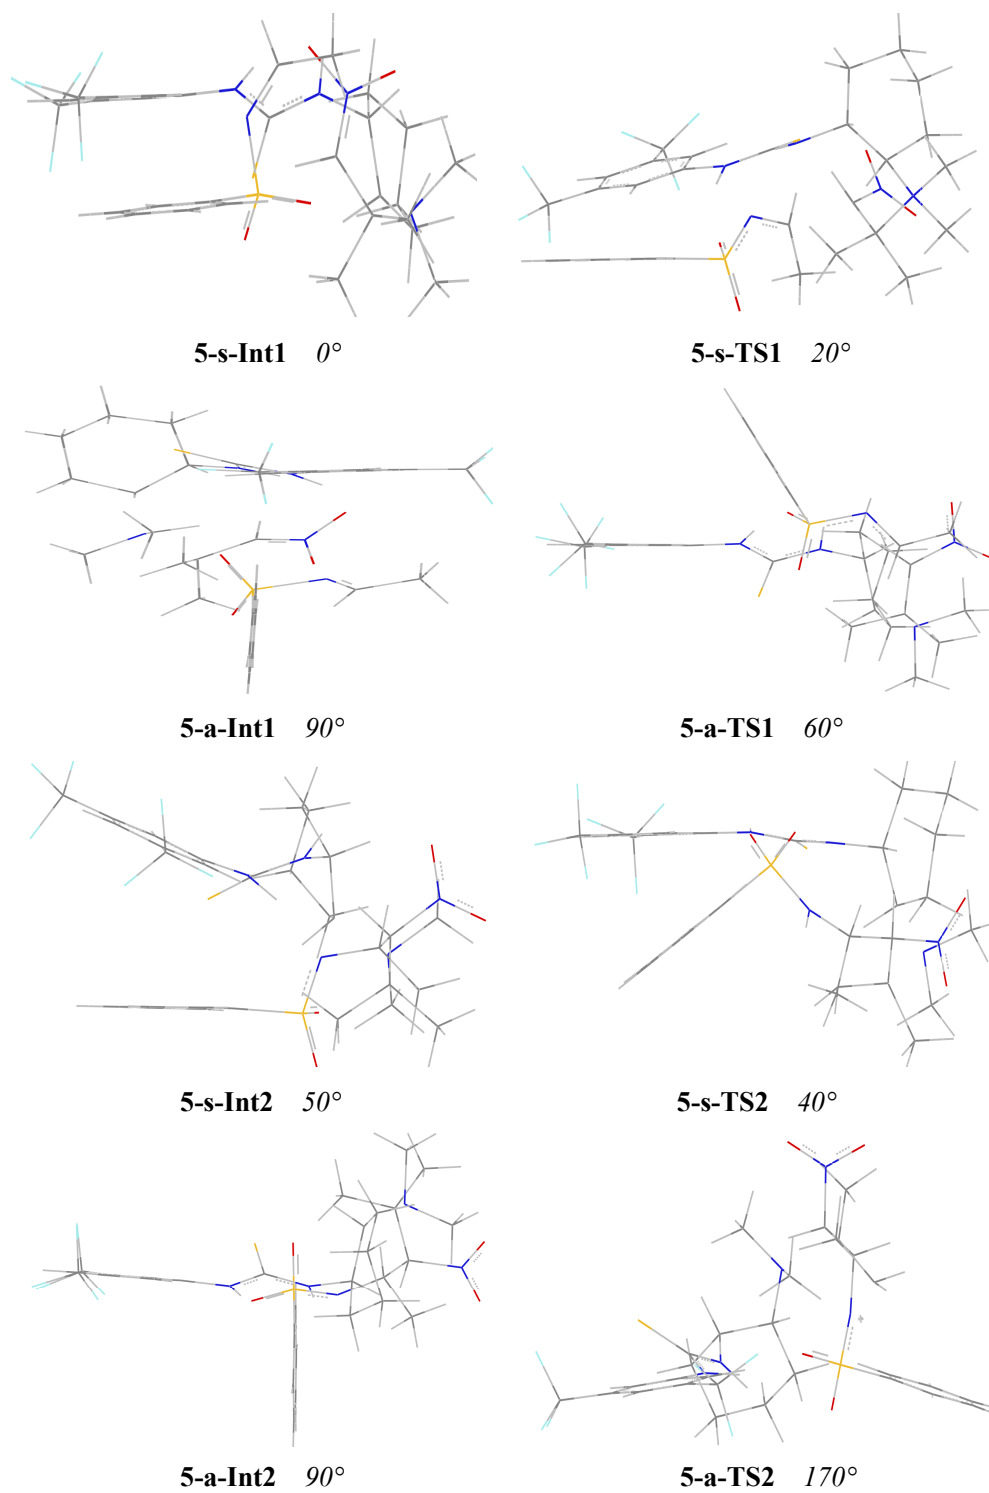

**Table 1.** Atom coordinates and two energies of **4-s-Int1** (E= -1486.9188 a.u., G= -1487.0031 a.u.)

| Center<br>Number | Atomic<br>Number | Atomic<br>Type | Coordinates (Angstroms) |           |           |
|------------------|------------------|----------------|-------------------------|-----------|-----------|
|                  |                  |                | X                       | Y         | Z         |
| 1                | 6                | 0              | -0.016565               | -0.021490 | -0.008617 |
| 2                | 6                | 0              | -0.098414               | -0.067933 | 1.547557  |
| 3                | 7                | 0              | 1.209748                | -0.044085 | 2.172394  |
| 4                | 6                | 0              | 2.198224                | -0.939928 | 2.057637  |
| 5                | 7                | 0              | 3.238180                | -0.717061 | 2.871735  |
| 6                | 16               | 0              | 2.213138                | -2.237138 | 0.967002  |
| 7                | 7                | 0              | -0.353026               | 1.392680  | -0.598274 |
| 8                | 6                | 0              | -0.364393               | 1.272618  | -2.087162 |
| 9                | 6                | 0              | -1.736598               | 1.804066  | -0.225176 |
| 10               | 6                | 0              | 0.730611                | 2.528839  | -0.207629 |
| 11               | 6                | 0              | 0.444926                | 2.984430  | 1.198349  |
| 12               | 6                | 0              | 2.128426                | 1.937118  | -0.395523 |
| 13               | 6                | 0              | 0.595447                | 3.730888  | -1.155697 |
| 14               | 7                | 0              | 1.255950                | 3.817914  | 1.828023  |
| 15               | 8                | 0              | 2.362690                | 4.170549  | 1.322487  |
| 16               | 8                | 0              | 0.927697                | 4.266641  | 2.959564  |
| 17               | 1                | 0              | 1.010367                | -0.182307 | -0.289965 |
| 18               | 1                | 0              | -0.525086               | 0.863311  | 1.884438  |
| 19               | 1                | 0              | 1.251242                | 0.582269  | 2.969793  |
| 20               | 1                | 0              | 3.298846                | 0.114667  | 3.440864  |
| 21               | 1                | 0              | 4.022100                | -1.328238 | 2.791838  |
| 22               | 1                | 0              | -0.596021               | 2.231626  | -2.519271 |
| 23               | 1                | 0              | -1.125315               | 0.570593  | -2.384044 |
| 24               | 1                | 0              | 0.598478                | 0.931941  | -2.437755 |
| 25               | 1                | 0              | -1.902424               | 2.824244  | -0.539147 |
| 26               | 1                | 0              | -1.892893               | 1.732649  | 0.837374  |
| 27               | 1                | 0              | -2.439863               | 1.155015  | -0.728493 |
| 28               | 1                | 0              | -0.514742               | 2.915032  | 1.659395  |
| 29               | 1                | 0              | 2.261593                | 1.490090  | -1.376208 |
| 30               | 1                | 0              | 2.371657                | 1.215991  | 0.370424  |
| 31               | 1                | 0              | 2.821185                | 2.758137  | -0.293405 |
| 32               | 1                | 0              | 1.220806                | 4.493523  | -0.704827 |
| 33               | 1                | 0              | -0.414323               | 4.125410  | -1.211598 |
| 34               | 1                | 0              | 0.971125                | 3.546246  | -2.157677 |
| 35               | 6                | 0              | 3.630852                | 3.176712  | 3.675983  |
| 36               | 7                | 0              | 3.061701                | 2.169987  | 4.199693  |
| 37               | 6                | 0              | 4.965214                | 3.072324  | 3.035878  |
| 38               | 1                | 0              | 3.139412                | 4.140610  | 3.624061  |

|    |   |   |           |           |           |
|----|---|---|-----------|-----------|-----------|
| 39 | 1 | 0 | 5.369611  | 2.070226  | 3.118254  |
| 40 | 1 | 0 | 4.861287  | 3.351856  | 1.991194  |
| 41 | 1 | 0 | 5.652363  | 3.782956  | 3.491316  |
| 42 | 6 | 0 | -0.970528 | -1.173362 | 2.144100  |
| 43 | 1 | 0 | -0.548361 | -2.155577 | 1.972324  |
| 44 | 1 | 0 | -1.022589 | -1.009374 | 3.215563  |
| 45 | 1 | 0 | -1.984010 | -1.145141 | 1.753217  |
| 46 | 6 | 0 | -0.827520 | -1.122348 | -0.681471 |
| 47 | 1 | 0 | -0.544895 | -2.047054 | -0.198005 |
| 48 | 1 | 0 | -1.902554 | -1.002774 | -0.587124 |
| 49 | 1 | 0 | -0.574182 | -1.243248 | -1.726425 |
| 50 | 6 | 0 | 1.799569  | 2.305265  | 4.797243  |
| 51 | 8 | 0 | 0.928965  | 1.510769  | 4.525188  |
| 52 | 6 | 0 | 1.625262  | 3.354589  | 5.852210  |
| 53 | 1 | 0 | 2.442275  | 3.320687  | 6.566539  |
| 54 | 1 | 0 | 1.621440  | 4.326575  | 5.368227  |
| 55 | 1 | 0 | 0.678787  | 3.203267  | 6.354136  |

**Table 2.** Atom coordinates and two energies of **4-s-TS1** (E= -1486.8952 a.u., G= -1486.9746 a.u.)

| Center Number | Atomic Number | Atomic Type | Coordinates (Angstroms) |           |           |
|---------------|---------------|-------------|-------------------------|-----------|-----------|
|               |               |             | X                       | Y         | Z         |
| 1             | 6             | 0           | -0.001558               | -0.000473 | 0.000365  |
| 2             | 6             | 0           | 0.003689                | -0.000702 | 1.568479  |
| 3             | 7             | 0           | 1.358411                | 0.000148  | 2.098181  |
| 4             | 6             | 0           | 2.288203                | -0.968058 | 1.929062  |
| 5             | 7             | 0           | 3.485299                | -0.687625 | 2.438216  |
| 6             | 16            | 0           | 2.006290                | -2.427767 | 1.115649  |
| 7             | 1             | 0           | 1.013285                | -0.173756 | -0.322458 |
| 8             | 1             | 0           | -0.411949               | 0.935168  | 1.900905  |
| 9             | 1             | 0           | 1.667194                | 0.840870  | 2.568409  |
| 10            | 1             | 0           | 3.783149                | 0.274611  | 2.612021  |
| 11            | 1             | 0           | 4.194768                | -1.368925 | 2.263816  |
| 12            | 7             | 0           | -0.367596               | 1.383500  | -0.636566 |
| 13            | 6             | 0           | -0.376392               | 1.199081  | -2.114466 |
| 14            | 6             | 0           | -1.744433               | 1.792728  | -0.252175 |
| 15            | 6             | 0           | 0.706729                | 2.649396  | -0.270622 |
| 16            | 6             | 0           | 0.378745                | 3.188148  | 1.088957  |
| 17            | 6             | 0           | 2.108778                | 2.056479  | -0.307265 |
| 18            | 6             | 0           | 0.626691                | 3.685327  | -1.393407 |
| 19            | 7             | 0           | -0.717562               | 4.063951  | 1.264539  |
| 20            | 8             | 0           | -1.024115               | 4.883781  | 0.402152  |



|    |   |   |           |           |           |
|----|---|---|-----------|-----------|-----------|
| 21 | 8 | 0 | -1.268070 | 4.030697  | 2.358922  |
| 22 | 6 | 0 | 1.795380  | 4.068428  | 2.258784  |
| 23 | 7 | 0 | 2.588093  | 3.070385  | 2.634342  |
| 24 | 1 | 0 | -0.629767 | 2.129641  | -2.593057 |
| 25 | 1 | 0 | -1.121862 | 0.469435  | -2.385633 |
| 26 | 1 | 0 | 0.594626  | 0.860471  | -2.449947 |
| 27 | 1 | 0 | -1.956506 | 2.768192  | -0.666770 |
| 28 | 1 | 0 | -1.845436 | 1.845491  | 0.820864  |
| 29 | 1 | 0 | -2.450860 | 1.073276  | -0.642745 |
| 30 | 1 | 0 | 0.312454  | 2.452356  | 1.853614  |
| 31 | 1 | 0 | 2.808499  | 2.883907  | -0.291775 |
| 32 | 1 | 0 | 2.283034  | 1.514471  | -1.231182 |
| 33 | 1 | 0 | 1.149256  | 4.565819  | -1.042862 |
| 34 | 1 | 0 | -0.372412 | 4.013832  | -1.636418 |
| 35 | 1 | 0 | 1.135064  | 3.329813  | -2.282284 |
| 36 | 1 | 0 | 2.346839  | 1.425505  | 0.531382  |
| 37 | 6 | 0 | -0.878115 | -1.047805 | 2.251035  |
| 38 | 1 | 0 | -0.524103 | -2.055457 | 2.087633  |
| 39 | 1 | 0 | -0.857686 | -0.850060 | 3.317770  |
| 40 | 1 | 0 | -1.908727 | -0.964192 | 1.917660  |
| 41 | 6 | 0 | -0.845507 | -1.129741 | -0.583161 |
| 42 | 1 | 0 | -1.913280 | -1.001910 | -0.438452 |
| 43 | 1 | 0 | -0.646833 | -1.297042 | -1.633401 |
| 44 | 1 | 0 | -0.537042 | -2.031418 | -0.073276 |
| 45 | 6 | 0 | 3.924419  | 2.982087  | 2.529782  |
| 46 | 8 | 0 | 4.491129  | 1.889727  | 2.489262  |
| 47 | 6 | 0 | 4.826574  | 4.203950  | 2.585399  |
| 48 | 1 | 0 | 4.977147  | 4.617747  | 1.591867  |
| 49 | 1 | 0 | 4.427600  | 4.985318  | 3.221752  |
| 50 | 1 | 0 | 5.790318  | 3.884772  | 2.961205  |
| 51 | 6 | 0 | 2.206448  | 5.304485  | 1.496189  |
| 52 | 1 | 0 | 2.889438  | 5.084747  | 0.682673  |
| 53 | 1 | 0 | 1.331550  | 5.809505  | 1.101082  |
| 54 | 1 | 0 | 2.705993  | 5.996822  | 2.169622  |
| 55 | 1 | 0 | 0.977415  | 4.267570  | 2.942272  |

**Table 3.** Atom coordinates and two energies of **4-s-Int2** (E= -1486.9015 a.u., G= -1486.9794 a.u.)

| Center Number | Atomic Number | Atomic Type | Coordinates (Angstroms) |           |          |
|---------------|---------------|-------------|-------------------------|-----------|----------|
|               |               |             | X                       | Y         | Z        |
| 1             | 6             | 0           | -0.122538               | -0.093528 | 0.074576 |
| 2             | 6             | 0           | 0.156651                | 0.169356  | 1.593588 |

|    |    |   |           |           |           |
|----|----|---|-----------|-----------|-----------|
| 3  | 7  | 0 | 1.529137  | -0.104528 | 1.951195  |
| 4  | 6  | 0 | 2.151882  | -1.301719 | 1.868206  |
| 5  | 7  | 0 | 3.428554  | -1.275728 | 2.218755  |
| 6  | 16 | 0 | 1.413381  | -2.732023 | 1.307157  |
| 7  | 1  | 0 | 0.718331  | -0.645667 | -0.311764 |
| 8  | 1  | 0 | 0.036590  | 1.226283  | 1.780669  |
| 9  | 1  | 0 | 2.156654  | 0.710486  | 1.999282  |
| 10 | 1  | 0 | 3.889798  | -0.416902 | 2.563838  |
| 11 | 1  | 0 | 3.927324  | -2.138232 | 2.161648  |
| 12 | 7  | 0 | -0.150709 | 1.221458  | -0.816300 |
| 13 | 6  | 0 | -0.531886 | 0.787124  | -2.196001 |
| 14 | 6  | 0 | -1.246600 | 2.125539  | -0.370879 |
| 15 | 6  | 0 | 1.275190  | 2.019080  | -0.916939 |
| 16 | 6  | 0 | 1.455717  | 2.940518  | 0.330589  |
| 17 | 6  | 0 | 2.373464  | 0.961777  | -1.022958 |
| 18 | 6  | 0 | 1.313518  | 2.820995  | -2.222501 |
| 19 | 7  | 0 | 0.725952  | 4.257882  | 0.237976  |
| 20 | 8  | 0 | 1.009146  | 5.039089  | -0.640152 |
| 21 | 8  | 0 | -0.068338 | 4.493484  | 1.122489  |
| 22 | 6  | 0 | 2.890562  | 3.280645  | 0.877160  |
| 23 | 7  | 0 | 3.302517  | 2.093593  | 1.556847  |
| 24 | 1  | 0 | -0.584461 | 1.642362  | -2.847390 |
| 25 | 1  | 0 | -1.506898 | 0.332635  | -2.162790 |
| 26 | 1  | 0 | 0.184915  | 0.071492  | -2.572263 |
| 27 | 1  | 0 | -1.280895 | 2.993260  | -1.016570 |
| 28 | 1  | 0 | -1.103941 | 2.449924  | 0.645702  |
| 29 | 1  | 0 | -2.184856 | 1.595666  | -0.450073 |
| 30 | 1  | 0 | 0.996033  | 2.494062  | 1.186629  |
| 31 | 1  | 0 | 3.280738  | 1.454107  | -1.340626 |
| 32 | 1  | 0 | 2.123925  | 0.238268  | -1.791897 |
| 33 | 1  | 0 | 2.174754  | 3.471797  | -2.173544 |
| 34 | 1  | 0 | 0.458149  | 3.463111  | -2.388673 |
| 35 | 1  | 0 | 1.448657  | 2.164536  | -3.072558 |
| 36 | 1  | 0 | 2.598168  | 0.468376  | -0.094904 |
| 37 | 6  | 0 | -0.823131 | -0.476673 | 2.575753  |
| 38 | 1  | 0 | -0.745146 | -1.555005 | 2.574116  |
| 39 | 1  | 0 | -0.566875 | -0.121357 | 3.568036  |
| 40 | 1  | 0 | -1.848418 | -0.182976 | 2.368250  |
| 41 | 6  | 0 | -1.353697 | -0.960106 | -0.162055 |
| 42 | 1  | 0 | -2.295772 | -0.477303 | 0.078032  |
| 43 | 1  | 0 | -1.401056 | -1.360241 | -1.165968 |
| 44 | 1  | 0 | -1.234363 | -1.814532 | 0.489443  |
| 45 | 6  | 0 | 4.211748  | 2.111709  | 2.516179  |
| 46 | 8  | 0 | 4.559008  | 1.069435  | 3.103974  |

|    |   |   |          |          |           |
|----|---|---|----------|----------|-----------|
| 47 | 6 | 0 | 4.906431 | 3.384279 | 2.976150  |
| 48 | 1 | 0 | 5.853360 | 3.487837 | 2.451153  |
| 49 | 1 | 0 | 4.332357 | 4.291992 | 2.816898  |
| 50 | 1 | 0 | 5.128767 | 3.280982 | 4.031095  |
| 51 | 6 | 0 | 3.885618 | 3.840389 | -0.140782 |
| 52 | 1 | 0 | 4.241961 | 3.080604 | -0.826791 |
| 53 | 1 | 0 | 3.472698 | 4.673545 | -0.701569 |
| 54 | 1 | 0 | 4.753066 | 4.206705 | 0.396704  |
| 55 | 1 | 0 | 2.674035 | 4.104386 | 1.568546  |

**Table 4.** Atom coordinates and two energies of **4-s-TS2** (E= -1486.8685 a.u., G= -1486.9490 a.u.)

| Center<br>Number | Atomic<br>Number | Atomic<br>Type | Coordinates (Angstroms) |           |           |
|------------------|------------------|----------------|-------------------------|-----------|-----------|
|                  |                  |                | X                       | Y         | Z         |
| 1                | 6                | 0              | -0.004107               | -0.007581 | -0.001850 |
| 2                | 6                | 0              | 0.001170                | -0.001508 | 1.558879  |
| 3                | 7                | 0              | 1.375988                | 0.002122  | 2.035082  |
| 4                | 6                | 0              | 2.255539                | -0.985696 | 2.292944  |
| 5                | 7                | 0              | 3.420590                | -0.528508 | 2.768690  |
| 6                | 16               | 0              | 2.030162                | -2.647478 | 2.074797  |
| 7                | 1                | 0              | 0.940237                | 0.424899  | -0.287812 |
| 8                | 1                | 0              | -0.351796               | 0.961892  | 1.889160  |
| 9                | 1                | 0              | 1.764286                | 0.923876  | 2.165570  |
| 10               | 1                | 0              | 3.570450                | 0.453476  | 2.928505  |
| 11               | 1                | 0              | 4.130178                | -1.197479 | 2.974648  |
| 12               | 7                | 0              | -1.028955               | 0.986226  | -0.671167 |
| 13               | 6                | 0              | -1.163253               | 0.583749  | -2.104004 |
| 14               | 6                | 0              | -2.388677               | 0.821922  | -0.096518 |
| 15               | 6                | 0              | -0.510761               | 2.559584  | -0.664840 |
| 16               | 6                | 0              | -0.884212               | 3.215575  | 0.725504  |
| 17               | 6                | 0              | 0.996300                | 2.515735  | -0.826074 |
| 18               | 6                | 0              | -1.222478               | 3.305582  | -1.798903 |
| 19               | 7                | 0              | -2.226576               | 3.900699  | 0.756425  |
| 20               | 8                | 0              | -2.357067               | 4.971390  | 0.213517  |
| 21               | 8                | 0              | -3.109263               | 3.344806  | 1.375950  |
| 22               | 6                | 0              | 0.163519                | 4.160549  | 1.397543  |
| 23               | 7                | 0              | 1.281248                | 3.286728  | 1.668312  |
| 24               | 1                | 0              | -1.901586               | 1.205370  | -2.581836 |
| 25               | 1                | 0              | -1.499402               | -0.438317 | -2.153684 |
| 26               | 1                | 0              | -0.211111               | 0.685140  | -2.603258 |
| 27               | 1                | 0              | -3.078996               | 1.472405  | -0.615919 |
| 28               | 1                | 0              | -2.411254               | 1.067082  | 0.950744  |

|    |   |   |           |           |           |
|----|---|---|-----------|-----------|-----------|
| 29 | 1 | 0 | -2.698991 | -0.205994 | -0.232502 |
| 30 | 1 | 0 | -1.026602 | 2.446808  | 1.457831  |
| 31 | 1 | 0 | 1.290612  | 3.501436  | -1.182868 |
| 32 | 1 | 0 | 1.255243  | 1.845962  | -1.645959 |
| 33 | 1 | 0 | -0.991882 | 4.354991  | -1.670308 |
| 34 | 1 | 0 | -2.308987 | 3.228843  | -1.814283 |
| 35 | 1 | 0 | -0.821833 | 3.008795  | -2.757920 |
| 36 | 1 | 0 | 1.495749  | 2.719882  | 0.719245  |
| 37 | 6 | 0 | -0.882605 | -1.034448 | 2.250791  |
| 38 | 1 | 0 | -0.588574 | -2.048509 | 2.026576  |
| 39 | 1 | 0 | -0.797065 | -0.901501 | 3.324231  |
| 40 | 1 | 0 | -1.924093 | -0.893152 | 1.978884  |
| 41 | 6 | 0 | -0.106629 | -1.423296 | -0.547182 |
| 42 | 1 | 0 | -1.097740 | -1.859472 | -0.448718 |
| 43 | 1 | 0 | 0.214401  | -1.501145 | -1.578256 |
| 44 | 1 | 0 | 0.570962  | -2.031101 | 0.044918  |
| 45 | 6 | 0 | 2.019027  | 3.250741  | 2.779185  |
| 46 | 8 | 0 | 2.876779  | 2.381743  | 2.941584  |
| 47 | 6 | 0 | 1.768253  | 4.259082  | 3.877349  |
| 48 | 1 | 0 | 1.697638  | 5.274491  | 3.501036  |
| 49 | 1 | 0 | 0.838053  | 4.030363  | 4.393324  |
| 50 | 1 | 0 | 2.579306  | 4.190256  | 4.589757  |
| 51 | 6 | 0 | 0.556925  | 5.442723  | 0.668497  |
| 52 | 1 | 0 | 1.034155  | 5.240090  | -0.280963 |
| 53 | 1 | 0 | -0.298303 | 6.085797  | 0.504805  |
| 54 | 1 | 0 | 1.274026  | 5.976640  | 1.284903  |
| 55 | 1 | 0 | -0.309681 | 4.455015  | 2.333815  |

**Table 5.** Atom coordinates and two energies of **4-s-Int3** (E= -1486.9427 a.u., G= -1487.0374 a.u.)

| Center Number | Atomic Number | Atomic Type | Coordinates (Angstroms) |           |           |
|---------------|---------------|-------------|-------------------------|-----------|-----------|
|               |               |             | X                       | Y         | Z         |
| 1             | 6             | 0           | 0.023864                | 0.001406  | -0.002516 |
| 2             | 6             | 0           | 0.015520                | -0.003677 | 1.540652  |
| 3             | 7             | 0           | 1.369396                | -0.012996 | 2.077699  |
| 4             | 6             | 0           | 2.132765                | 1.063343  | 2.271141  |
| 5             | 7             | 0           | 3.368411                | 0.789321  | 2.791284  |
| 6             | 16            | 0           | 1.711927                | 2.641381  | 1.883620  |
| 7             | 1             | 0           | 0.611658                | 0.876452  | -0.264437 |
| 8             | 1             | 0           | -0.432543               | 0.937938  | 1.836220  |
| 9             | 1             | 0           | 1.781898                | -0.904732 | 2.303682  |
| 10            | 1             | 0           | 3.485978                | -0.081580 | 3.281164  |

|    |   |   |           |           |           |
|----|---|---|-----------|-----------|-----------|
| 11 | 1 | 0 | 3.846326  | 1.588326  | 3.156496  |
| 12 | 7 | 0 | -1.335476 | 0.244441  | -0.493373 |
| 13 | 6 | 0 | -1.431250 | 1.387211  | -1.372955 |
| 14 | 6 | 0 | -2.065175 | -0.887524 | -1.014373 |
| 15 | 6 | 0 | 6.813316  | 0.907253  | 0.315982  |
| 16 | 6 | 0 | 6.839566  | -0.575513 | 0.046605  |
| 17 | 6 | 0 | 5.723331  | 1.658327  | 0.274778  |
| 18 | 6 | 0 | 8.138712  | 1.475133  | 0.742096  |
| 19 | 7 | 0 | 7.770157  | -0.897043 | -1.103011 |
| 20 | 8 | 0 | 7.967597  | -0.055528 | -1.943126 |
| 21 | 8 | 0 | 8.223207  | -2.018781 | -1.117576 |
| 22 | 6 | 0 | 5.545309  | -1.371155 | -0.240794 |
| 23 | 6 | 0 | 4.827350  | -1.010537 | -1.538891 |
| 24 | 7 | 0 | 4.680737  | -1.317224 | 0.917501  |
| 25 | 1 | 0 | -2.477447 | 1.614222  | -1.562625 |
| 26 | 1 | 0 | -0.944357 | 1.232805  | -2.345025 |
| 27 | 1 | 0 | -0.982391 | 2.255984  | -0.902576 |
| 28 | 1 | 0 | -3.107172 | -0.605755 | -1.143333 |
| 29 | 1 | 0 | -2.039718 | -1.721091 | -0.321383 |
| 30 | 1 | 0 | -1.699984 | -1.245329 | -1.984498 |
| 31 | 1 | 0 | 7.319423  | -1.068319 | 0.886839  |
| 32 | 1 | 0 | 5.770779  | 2.701467  | 0.539405  |
| 33 | 1 | 0 | 4.750872  | 1.302177  | -0.008514 |
| 34 | 1 | 0 | 8.878031  | 1.382173  | -0.048486 |
| 35 | 1 | 0 | 8.525444  | 0.952580  | 1.616129  |
| 36 | 1 | 0 | 8.045160  | 2.525813  | 0.991379  |
| 37 | 1 | 0 | 5.887451  | -2.393556 | -0.338332 |
| 38 | 1 | 0 | 4.409483  | -0.012364 | -1.526405 |
| 39 | 1 | 0 | 4.014286  | -1.711860 | -1.698010 |
| 40 | 1 | 0 | 5.501378  | -1.078159 | -2.386732 |
| 41 | 1 | 0 | 4.382828  | -0.415212 | 1.256483  |
| 42 | 6 | 0 | -0.767959 | -1.140687 | 2.174724  |
| 43 | 1 | 0 | -0.351461 | -2.115333 | 1.927504  |
| 44 | 1 | 0 | -0.764119 | -1.041593 | 3.256198  |
| 45 | 1 | 0 | -1.797162 | -1.110432 | 1.837255  |
| 46 | 6 | 0 | 0.733573  | -1.202130 | -0.618977 |
| 47 | 1 | 0 | 0.250930  | -2.146383 | -0.384581 |
| 48 | 1 | 0 | 0.771613  | -1.109821 | -1.701006 |
| 49 | 1 | 0 | 1.756593  | -1.252155 | -0.257716 |
| 50 | 6 | 0 | 4.167277  | -2.358792 | 1.606580  |
| 51 | 8 | 0 | 3.403130  | -2.172338 | 2.544780  |
| 52 | 6 | 0 | 4.553406  | -3.757815 | 1.202874  |
| 53 | 1 | 0 | 5.625060  | -3.914457 | 1.288664  |
| 54 | 1 | 0 | 4.039925  | -4.442565 | 1.863264  |

55            1            0            4.266857    -3.967654    0.176216

---

**Table 6.** Atom coordinates and two energies of **4-a-Int1** (E= -1486.9165 a.u., G= -1487.0003 a.u.)

---

| Center<br>Number | Atomic<br>Number | Atomic<br>Type | Coordinates (Angstroms) |           |           |
|------------------|------------------|----------------|-------------------------|-----------|-----------|
|                  |                  |                | X                       | Y         | Z         |
| 1                | 6                | 0              | 0.007869                | 0.007289  | 0.003181  |
| 2                | 6                | 0              | 0.011052                | 0.003075  | 1.565364  |
| 3                | 7                | 0              | 1.354411                | -0.004555 | 2.117689  |
| 4                | 6                | 0              | 2.309764                | -0.938925 | 1.966996  |
| 5                | 7                | 0              | 3.436252                | -0.694228 | 2.641166  |
| 6                | 16               | 0              | 2.168172                | -2.320544 | 0.995917  |
| 7                | 7                | 0              | -0.515355               | 1.359797  | -0.596949 |
| 8                | 6                | 0              | -0.428751               | 1.255766  | -2.083361 |
| 9                | 6                | 0              | -1.962111               | 1.528348  | -0.279444 |
| 10               | 6                | 0              | 0.337760                | 2.662528  | -0.145471 |
| 11               | 6                | 0              | -0.146906               | 3.075334  | 1.220067  |
| 12               | 6                | 0              | 1.820530                | 2.302679  | -0.215769 |
| 13               | 6                | 0              | 0.085182                | 3.818976  | -1.124630 |
| 14               | 7                | 0              | 0.467121                | 4.022111  | 1.918573  |
| 15               | 8                | 0              | 1.573678                | 4.497773  | 1.553670  |
| 16               | 8                | 0              | -0.066417               | 4.442695  | 2.980967  |
| 17               | 1                | 0              | 1.032111                | -0.043546 | -0.329494 |
| 18               | 1                | 0              | -0.355885               | 0.970174  | 1.879194  |
| 19               | 1                | 0              | 1.530864                | 0.718116  | 2.810173  |
| 20               | 1                | 0              | 3.626116                | 0.211383  | 3.051973  |
| 21               | 1                | 0              | 4.191809                | -1.328476 | 2.491091  |
| 22               | 1                | 0              | -0.839067               | 2.147399  | -2.528244 |
| 23               | 1                | 0              | -1.004556               | 0.409972  | -2.418518 |
| 24               | 1                | 0              | 0.601345                | 1.133335  | -2.383699 |
| 25               | 1                | 0              | -2.267101               | 2.538371  | -0.511615 |
| 26               | 1                | 0              | -2.146170               | 1.329357  | 0.764188  |
| 27               | 1                | 0              | -2.536800               | 0.835841  | -0.877686 |
| 28               | 1                | 0              | -1.163086               | 2.946918  | 1.522822  |
| 29               | 1                | 0              | 2.097632                | 1.913536  | -1.191323 |
| 30               | 1                | 0              | 2.113533                | 1.601089  | 0.550823  |
| 31               | 1                | 0              | 2.369830                | 3.214902  | -0.039713 |
| 32               | 1                | 0              | 0.553370                | 4.674844  | -0.650478 |
| 33               | 1                | 0              | -0.967493               | 4.052260  | -1.254094 |
| 34               | 1                | 0              | 0.550523                | 3.685670  | -2.096499 |
| 35               | 6                | 0              | 0.960276                | 2.853234  | 4.756295  |
| 36               | 7                | 0              | 1.854839                | 2.190526  | 4.138636  |

---

|    |   |   |           |           |           |
|----|---|---|-----------|-----------|-----------|
| 37 | 6 | 0 | -0.371036 | 2.271305  | 5.054766  |
| 38 | 1 | 0 | 1.135062  | 3.854401  | 5.127372  |
| 39 | 1 | 0 | -0.427702 | 1.240200  | 4.725994  |
| 40 | 1 | 0 | -0.568789 | 2.318682  | 6.123720  |
| 41 | 1 | 0 | -1.118180 | 2.874391  | 4.548507  |
| 42 | 6 | 0 | -0.722981 | -1.187496 | -0.599084 |
| 43 | 1 | 0 | -1.795722 | -1.174609 | -0.439144 |
| 44 | 1 | 0 | -0.522387 | -1.312053 | -1.655200 |
| 45 | 1 | 0 | -0.313974 | -2.062379 | -0.113191 |
| 46 | 6 | 0 | -0.876794 | -1.048425 | 2.230151  |
| 47 | 1 | 0 | -0.503783 | -2.051794 | 2.070550  |
| 48 | 1 | 0 | -0.883836 | -0.860112 | 3.299206  |
| 49 | 1 | 0 | -1.903542 | -0.989847 | 1.877828  |
| 50 | 6 | 0 | 3.116671  | 2.772968  | 3.904290  |
| 51 | 8 | 0 | 3.989189  | 2.054389  | 3.473628  |
| 52 | 6 | 0 | 3.361979  | 4.232329  | 4.158880  |
| 53 | 1 | 0 | 2.672271  | 4.816969  | 3.555976  |
| 54 | 1 | 0 | 3.220012  | 4.480019  | 5.207731  |
| 55 | 1 | 0 | 4.383066  | 4.454026  | 3.879812  |

**Table 7.** Atom coordinates and two energies of **4-a-TS1** (E= -1486.8902 a.u., G= -1486.9699 a.u.)

| Center Number | Atomic Number | Atomic Type | Coordinates (Angstroms) |           |           |
|---------------|---------------|-------------|-------------------------|-----------|-----------|
|               |               |             | X                       | Y         | Z         |
| 1             | 6             | 0           | -0.005628               | -0.002076 | 0.000663  |
| 2             | 6             | 0           | 0.003750                | 0.001373  | 1.561769  |
| 3             | 7             | 0           | 1.345452                | 0.000962  | 2.105314  |
| 4             | 6             | 0           | 2.329033                | -0.896310 | 1.937560  |
| 5             | 7             | 0           | 3.481204                | -0.549626 | 2.520841  |
| 6             | 16            | 0           | 2.191987                | -2.342338 | 1.063749  |
| 7             | 1             | 0           | 1.022573                | -0.005719 | -0.329812 |
| 8             | 1             | 0           | -0.373080               | 0.960085  | 1.880756  |
| 9             | 1             | 0           | 1.532658                | 0.821432  | 2.691149  |
| 10            | 1             | 0           | 3.642950                | 0.413367  | 2.795395  |
| 11            | 1             | 0           | 4.260143                | -1.153048 | 2.363084  |
| 12            | 7             | 0           | -0.590880               | 1.317501  | -0.627062 |
| 13            | 6             | 0           | -0.362306               | 1.205492  | -2.100664 |
| 14            | 6             | 0           | -2.071255               | 1.361138  | -0.438990 |
| 15            | 6             | 0           | 0.101434                | 2.726313  | -0.116541 |
| 16            | 6             | 0           | -0.584942               | 3.160948  | 1.197489  |
| 17            | 6             | 0           | 1.601056                | 2.493685  | -0.004011 |
| 18            | 6             | 0           | -0.110428               | 3.766285  | -1.223167 |

|    |   |   |           |           |           |
|----|---|---|-----------|-----------|-----------|
| 19 | 7 | 0 | -1.100044 | 4.480107  | 1.259451  |
| 20 | 8 | 0 | -0.367216 | 5.434196  | 1.004961  |
| 21 | 8 | 0 | -2.228637 | 4.630799  | 1.714249  |
| 22 | 6 | 0 | 0.420989  | 3.323713  | 3.108018  |
| 23 | 7 | 0 | 1.509346  | 2.574573  | 3.189952  |
| 24 | 1 | 0 | -0.881726 | 1.998696  | -2.611613 |
| 25 | 1 | 0 | -0.753740 | 0.266503  | -2.449536 |
| 26 | 1 | 0 | 0.695691  | 1.251709  | -2.313903 |
| 27 | 1 | 0 | -2.430682 | 2.366565  | -0.604839 |
| 28 | 1 | 0 | -2.338665 | 1.049942  | 0.559111  |
| 29 | 1 | 0 | -2.534366 | 0.689834  | -1.148166 |
| 30 | 1 | 0 | -1.396339 | 2.529587  | 1.490300  |
| 31 | 1 | 0 | 2.043112  | 3.451479  | 0.246707  |
| 32 | 1 | 0 | 2.033777  | 2.185423  | -0.951293 |
| 33 | 1 | 0 | 0.250790  | 4.707958  | -0.840662 |
| 34 | 1 | 0 | -1.154256 | 3.914940  | -1.484199 |
| 35 | 1 | 0 | 0.457441  | 3.534714  | -2.113709 |
| 36 | 1 | 0 | 1.886155  | 1.791343  | 0.760089  |
| 37 | 6 | 0 | -0.882165 | -1.042969 | 2.242010  |
| 38 | 1 | 0 | -0.505991 | -2.046014 | 2.090239  |
| 39 | 1 | 0 | -0.877689 | -0.842167 | 3.308411  |
| 40 | 1 | 0 | -1.911950 | -0.990910 | 1.897368  |
| 41 | 6 | 0 | -0.682848 | -1.241719 | -0.574924 |
| 42 | 1 | 0 | -1.750025 | -1.280146 | -0.388946 |
| 43 | 1 | 0 | -0.500764 | -1.380992 | -1.632153 |
| 44 | 1 | 0 | -0.216104 | -2.083275 | -0.081114 |
| 45 | 6 | 0 | 2.742990  | 3.091166  | 2.941380  |
| 46 | 8 | 0 | 3.704408  | 2.344851  | 2.804351  |
| 47 | 6 | 0 | 2.973052  | 4.587867  | 2.878759  |
| 48 | 1 | 0 | 2.370645  | 5.062288  | 2.108677  |
| 49 | 1 | 0 | 2.709634  | 5.054909  | 3.824296  |
| 50 | 1 | 0 | 4.021033  | 4.762004  | 2.675825  |
| 51 | 6 | 0 | -0.742860 | 2.909021  | 3.961460  |
| 52 | 1 | 0 | -0.513935 | 3.206970  | 4.983612  |
| 53 | 1 | 0 | -1.667884 | 3.390233  | 3.669998  |
| 54 | 1 | 0 | -0.857802 | 1.829767  | 3.963429  |
| 55 | 1 | 0 | 0.514022  | 4.394050  | 2.965884  |

**Table 8.** Atom coordinates and two energies of **4-a-Int2** (E= -1486.9054 a.u., G= -1486.9839 a.u.)

| Center<br>Number | Atomic<br>Number | Atomic<br>Type | Coordinates (Angstroms) |   |   |
|------------------|------------------|----------------|-------------------------|---|---|
|                  |                  |                | X                       | Y | Z |



|    |    |   |           |           |           |
|----|----|---|-----------|-----------|-----------|
| 1  | 6  | 0 | 0.008180  | -0.154234 | 0.030174  |
| 2  | 6  | 0 | -0.043239 | -0.164335 | 1.595734  |
| 3  | 7  | 0 | 1.275640  | -0.230384 | 2.181782  |
| 4  | 6  | 0 | 2.160926  | -1.240555 | 2.033887  |
| 5  | 7  | 0 | 3.334519  | -1.037534 | 2.612270  |
| 6  | 16 | 0 | 1.855120  | -2.660353 | 1.140488  |
| 7  | 1  | 0 | 1.020375  | -0.385460 | -0.259018 |
| 8  | 1  | 0 | -0.426795 | 0.789230  | 1.921871  |
| 9  | 1  | 0 | 1.647605  | 0.664710  | 2.529291  |
| 10 | 1  | 0 | 3.600953  | -0.132240 | 3.035540  |
| 11 | 1  | 0 | 4.020620  | -1.751277 | 2.485053  |
| 12 | 7  | 0 | -0.245048 | 1.276336  | -0.612166 |
| 13 | 6  | 0 | -0.229087 | 1.077923  | -2.095069 |
| 14 | 6  | 0 | -1.620097 | 1.747171  | -0.288840 |
| 15 | 6  | 0 | 0.868147  | 2.409885  | -0.244417 |
| 16 | 6  | 0 | 0.549382  | 3.066455  | 1.143165  |
| 17 | 6  | 0 | 2.239065  | 1.736052  | -0.277925 |
| 18 | 6  | 0 | 0.898929  | 3.471925  | -1.351574 |
| 19 | 7  | 0 | -0.464143 | 4.181402  | 1.047161  |
| 20 | 8  | 0 | -0.169468 | 5.194758  | 0.458414  |
| 21 | 8  | 0 | -1.507557 | 4.022253  | 1.641037  |
| 22 | 6  | 0 | 1.760330  | 3.592779  | 1.975997  |
| 23 | 7  | 0 | 2.370190  | 2.411473  | 2.507352  |
| 24 | 1  | 0 | -0.416923 | 2.014328  | -2.591273 |
| 25 | 1  | 0 | -1.014355 | 0.393121  | -2.364157 |
| 26 | 1  | 0 | 0.723120  | 0.671442  | -2.404584 |
| 27 | 1  | 0 | -1.793351 | 2.704755  | -0.760725 |
| 28 | 1  | 0 | -1.760897 | 1.850691  | 0.773507  |
| 29 | 1  | 0 | -2.330716 | 1.033586  | -0.679325 |
| 30 | 1  | 0 | 0.065968  | 2.375974  | 1.803142  |
| 31 | 1  | 0 | 2.991351  | 2.508636  | -0.183354 |
| 32 | 1  | 0 | 2.390952  | 1.259742  | -1.241470 |
| 33 | 1  | 0 | 1.510195  | 4.288884  | -0.993043 |
| 34 | 1  | 0 | -0.063556 | 3.900741  | -1.600557 |
| 35 | 1  | 0 | 1.365362  | 3.082841  | -2.247024 |
| 36 | 1  | 0 | 2.409086  | 1.034930  | 0.518050  |
| 37 | 6  | 0 | -1.007590 | -1.168944 | 2.229945  |
| 38 | 1  | 0 | -0.691716 | -2.190636 | 2.072840  |
| 39 | 1  | 0 | -1.016996 | -0.979139 | 3.297964  |
| 40 | 1  | 0 | -2.020110 | -1.037226 | 1.857524  |
| 41 | 6  | 0 | -0.880741 | -1.218723 | -0.601509 |
| 42 | 1  | 0 | -1.944856 | -1.037254 | -0.491994 |
| 43 | 1  | 0 | -0.651296 | -1.396043 | -1.643718 |
| 44 | 1  | 0 | -0.637044 | -2.137035 | -0.085599 |

|    |   |   |          |          |          |
|----|---|---|----------|----------|----------|
| 45 | 6 | 0 | 3.604370 | 2.425213 | 2.974350 |
| 46 | 8 | 0 | 4.141462 | 1.408931 | 3.457117 |
| 47 | 6 | 0 | 4.483018 | 3.669477 | 2.979914 |
| 48 | 1 | 0 | 5.486466 | 3.369777 | 2.699956 |
| 49 | 1 | 0 | 4.154784 | 4.475802 | 2.332642 |
| 50 | 1 | 0 | 4.537040 | 4.052284 | 3.995997 |
| 51 | 6 | 0 | 1.274845 | 4.524145 | 3.094237 |
| 52 | 1 | 0 | 0.833030 | 5.447363 | 2.732502 |
| 53 | 1 | 0 | 0.561188 | 4.006894 | 3.729309 |
| 54 | 1 | 0 | 2.127154 | 4.783491 | 3.710209 |
| 55 | 1 | 0 | 2.397950 | 4.175278 | 1.303469 |

**Table 9.** Atom coordinates and two energies of **4-a-TS2** (E= -1486.8666 a.u., G= -1486.9460 a.u.)

| Center<br>Number | Atomic<br>Number | Atomic<br>Type | Coordinates (Angstroms) |           |           |
|------------------|------------------|----------------|-------------------------|-----------|-----------|
|                  |                  |                | X                       | Y         | Z         |
| 1                | 6                | 0              | 0.004013                | 0.007317  | 0.002953  |
| 2                | 6                | 0              | -0.000493               | 0.007001  | 1.562114  |
| 3                | 7                | 0              | 1.376278                | 0.000077  | 2.039143  |
| 4                | 6                | 0              | 2.256721                | -0.985058 | 2.300651  |
| 5                | 7                | 0              | 3.450983                | -0.521284 | 2.695160  |
| 6                | 16               | 0              | 2.003872                | -2.653883 | 2.194823  |
| 7                | 1                | 0              | 0.920334                | 0.509847  | -0.281712 |
| 8                | 1                | 0              | -0.344857               | 0.976900  | 1.891136  |
| 9                | 1                | 0              | 1.770042                | 0.923410  | 2.117145  |
| 10               | 1                | 0              | 3.650502                | 0.464284  | 2.714409  |
| 11               | 1                | 0              | 4.165559                | -1.191471 | 2.878931  |
| 12               | 7                | 0              | -1.059718               | 0.925695  | -0.657370 |
| 13               | 6                | 0              | -1.149943               | 0.539635  | -2.091485 |
| 14               | 6                | 0              | -2.416294               | 0.714583  | -0.104491 |
| 15               | 6                | 0              | -0.577848               | 2.625911  | -0.650596 |
| 16               | 6                | 0              | -0.991048               | 3.227754  | 0.750208  |
| 17               | 6                | 0              | 0.887196                | 2.632333  | -0.824384 |
| 18               | 6                | 0              | -1.375625               | 3.271027  | -1.786554 |
| 19               | 7                | 0              | -2.207683               | 4.097888  | 0.605040  |
| 20               | 8                | 0              | -2.050676               | 5.263580  | 0.332745  |
| 21               | 8                | 0              | -3.284914               | 3.568818  | 0.763778  |
| 22               | 6                | 0              | 0.061469                | 4.013662  | 1.577701  |
| 23               | 7                | 0              | 1.171005                | 3.095831  | 1.765065  |
| 24               | 1                | 0              | -1.908394               | 1.129368  | -2.578043 |
| 25               | 1                | 0              | -1.434669               | -0.497839 | -2.168270 |
| 26               | 1                | 0              | -0.194073               | 0.691460  | -2.572522 |

|    |   |   |           |           |           |
|----|---|---|-----------|-----------|-----------|
| 27 | 1 | 0 | -3.119571 | 1.355613  | -0.616594 |
| 28 | 1 | 0 | -2.459609 | 0.941263  | 0.947287  |
| 29 | 1 | 0 | -2.700786 | -0.321261 | -0.250528 |
| 30 | 1 | 0 | -1.347938 | 2.442622  | 1.391921  |
| 31 | 1 | 0 | 1.214866  | 3.670615  | -0.788183 |
| 32 | 1 | 0 | 1.159091  | 2.255660  | -1.809399 |
| 33 | 1 | 0 | -1.199614 | 4.336794  | -1.704722 |
| 34 | 1 | 0 | -2.453833 | 3.120860  | -1.770338 |
| 35 | 1 | 0 | -0.978131 | 2.971819  | -2.745199 |
| 36 | 1 | 0 | 1.330752  | 2.578280  | 0.824937  |
| 37 | 6 | 0 | -0.882620 | -1.029220 | 2.251161  |
| 38 | 1 | 0 | -0.600842 | -2.041753 | 2.005694  |
| 39 | 1 | 0 | -0.776855 | -0.917800 | 3.325255  |
| 40 | 1 | 0 | -1.927295 | -0.877368 | 2.000349  |
| 41 | 6 | 0 | -0.000196 | -1.414043 | -0.542162 |
| 42 | 1 | 0 | -0.969387 | -1.902636 | -0.468905 |
| 43 | 1 | 0 | 0.345290  | -1.471397 | -1.566893 |
| 44 | 1 | 0 | 0.691278  | -1.991188 | 0.063199  |
| 45 | 6 | 0 | 2.320919  | 3.328278  | 2.440149  |
| 46 | 8 | 0 | 3.166704  | 2.442942  | 2.494758  |
| 47 | 6 | 0 | 2.599864  | 4.646726  | 3.117132  |
| 48 | 1 | 0 | 3.674505  | 4.776319  | 3.142995  |
| 49 | 1 | 0 | 2.140396  | 5.490259  | 2.613674  |
| 50 | 1 | 0 | 2.244898  | 4.620883  | 4.143825  |
| 51 | 6 | 0 | -0.573945 | 4.421694  | 2.906634  |
| 52 | 1 | 0 | 0.122165  | 4.981334  | 3.516028  |
| 53 | 1 | 0 | -1.440212 | 5.055739  | 2.757506  |
| 54 | 1 | 0 | -0.871301 | 3.538724  | 3.466697  |
| 55 | 1 | 0 | 0.347895  | 4.904691  | 1.020521  |

**Table 10.** Atom coordinates and two energies of **4-a-Int3** (E= -1486.9446 a.u., G= -1487.0349 a.u.)

| Center Number | Atomic Number | Atomic Type | Coordinates (Angstroms) |           |           |
|---------------|---------------|-------------|-------------------------|-----------|-----------|
|               |               |             | X                       | Y         | Z         |
| 1             | 6             | 0           | -0.053036               | -1.401255 | 0.361943  |
| 2             | 6             | 0           | 0.239377                | -1.476498 | 1.866549  |
| 3             | 7             | 0           | 1.462948                | -0.741557 | 2.129851  |
| 4             | 6             | 0           | 1.798372                | -0.203527 | 3.303725  |
| 5             | 7             | 0           | 3.031356                | 0.366917  | 3.330906  |
| 6             | 16            | 0           | 0.808352                | -0.158943 | 4.663156  |
| 7             | 1             | 0           | 0.843576                | -1.755260 | -0.146850 |
| 8             | 1             | 0           | -0.556810               | -0.997139 | 2.428352  |

|    |   |   |           |           |           |
|----|---|---|-----------|-----------|-----------|
| 9  | 1 | 0 | 2.096814  | -0.597238 | 1.355832  |
| 10 | 1 | 0 | 3.694713  | 0.125414  | 2.618826  |
| 11 | 1 | 0 | 3.376980  | 0.600246  | 4.238276  |
| 12 | 7 | 0 | -0.224477 | -0.007803 | -0.082627 |
| 13 | 6 | 0 | 0.057094  | 0.149275  | -1.498687 |
| 14 | 6 | 0 | -1.511971 | 0.567121  | 0.263823  |
| 15 | 6 | 0 | 0.549552  | 4.110959  | -1.442289 |
| 16 | 6 | 0 | 0.490555  | 4.057694  | 0.069900  |
| 17 | 6 | 0 | 1.690235  | 4.090540  | -2.111911 |
| 18 | 6 | 0 | -0.784265 | 4.239660  | -2.120111 |
| 19 | 7 | 0 | 0.232212  | 5.474492  | 0.529359  |
| 20 | 8 | 0 | 1.180831  | 6.218135  | 0.602281  |
| 21 | 8 | 0 | -0.913377 | 5.776548  | 0.761454  |
| 22 | 6 | 0 | 1.696658  | 3.516311  | 0.848906  |
| 23 | 7 | 0 | 1.984728  | 2.158963  | 0.428202  |
| 24 | 1 | 0 | 0.025063  | 1.202445  | -1.761536 |
| 25 | 1 | 0 | -0.649484 | -0.377702 | -2.146977 |
| 26 | 1 | 0 | 1.059135  | -0.210166 | -1.710337 |
| 27 | 1 | 0 | -1.509084 | 1.626126  | 0.021443  |
| 28 | 1 | 0 | -1.698053 | 0.474685  | 1.328079  |
| 29 | 1 | 0 | -2.349880 | 0.115709  | -0.273925 |
| 30 | 1 | 0 | -0.406458 | 3.532323  | 0.377609  |
| 31 | 1 | 0 | 1.698540  | 4.151381  | -3.187605 |
| 32 | 1 | 0 | 2.647196  | 4.013155  | -1.629299 |
| 33 | 1 | 0 | -1.326179 | 5.110473  | -1.759534 |
| 34 | 1 | 0 | -1.411877 | 3.373647  | -1.916060 |
| 35 | 1 | 0 | -0.667325 | 4.328146  | -3.194340 |
| 36 | 1 | 0 | 1.235154  | 1.472158  | 0.466402  |
| 37 | 6 | 0 | 0.374151  | -2.912107 | 2.366748  |
| 38 | 1 | 0 | 1.114065  | -3.458595 | 1.785176  |
| 39 | 1 | 0 | 0.689040  | -2.897112 | 3.403554  |
| 40 | 1 | 0 | -0.569869 | -3.444306 | 2.313705  |
| 41 | 6 | 0 | -1.205684 | -2.321765 | -0.043675 |
| 42 | 1 | 0 | -2.085490 | -2.167008 | 0.575294  |
| 43 | 1 | 0 | -1.489992 | -2.152768 | -1.077850 |
| 44 | 1 | 0 | -0.918399 | -3.363147 | 0.045055  |
| 45 | 6 | 0 | 3.210966  | 1.610502  | 0.353241  |
| 46 | 8 | 0 | 3.359796  | 0.396643  | 0.255391  |
| 47 | 6 | 0 | 4.418754  | 2.511963  | 0.401013  |
| 48 | 1 | 0 | 4.506271  | 2.985104  | 1.375570  |
| 49 | 1 | 0 | 5.292290  | 1.899263  | 0.225277  |
| 50 | 1 | 0 | 4.378609  | 3.298038  | -0.346153 |
| 51 | 6 | 0 | 1.444702  | 3.574036  | 2.355057  |
| 52 | 1 | 0 | 2.293366  | 3.155742  | 2.884407  |

|    |   |   |          |          |          |
|----|---|---|----------|----------|----------|
| 53 | 1 | 0 | 1.296478 | 4.592804 | 2.697236 |
| 54 | 1 | 0 | 0.575881 | 2.980870 | 2.628012 |
| 55 | 1 | 0 | 2.544791 | 4.143029 | 0.607338 |

**Table 11.** Atom coordinates and two energies of **5-s-Int1** (E= -3095.9361 a.u., G= -3096.0627 a.u.)

| Center Number | Atomic Number | Atomic Type | Coordinates (Angstroms) |           |           |
|---------------|---------------|-------------|-------------------------|-----------|-----------|
|               |               |             | X                       | Y         | Z         |
| 1             | 7             | 0           | -0.684735               | 0.795423  | -0.304808 |
| 2             | 6             | 0           | -0.857171               | 0.787154  | 1.042490  |
| 3             | 7             | 0           | 0.301943                | 1.175385  | 1.680659  |
| 4             | 16            | 0           | -2.255856               | 0.267622  | 1.829300  |
| 5             | 7             | 0           | -0.865075               | -2.288495 | -1.823970 |
| 6             | 6             | 0           | -1.533268               | -3.634519 | -2.008940 |
| 7             | 6             | 0           | -0.476285               | -1.815706 | -3.208970 |
| 8             | 1             | 0           | 0.199992                | 1.165614  | -0.626543 |
| 9             | 1             | 0           | 1.141448                | 1.130441  | 1.095278  |
| 10            | 1             | 0           | -0.778944               | -4.359499 | -2.271723 |
| 11            | 1             | 0           | -2.249854               | -3.580741 | -2.814409 |
| 12            | 1             | 0           | -2.025632               | -3.942908 | -1.100225 |
| 13            | 1             | 0           | -0.084981               | -2.658081 | -3.764575 |
| 14            | 1             | 0           | 0.298979                | -1.064177 | -3.146065 |
| 15            | 1             | 0           | -1.360467               | -1.443212 | -3.713399 |
| 16            | 6             | 0           | 0.487902                | -2.583333 | -0.922325 |
| 17            | 6             | 0           | 1.076828                | -1.324180 | -0.383374 |
| 18            | 6             | 0           | 0.072191                | -3.418441 | 0.300417  |
| 19            | 6             | 0           | 1.513839                | -3.364305 | -1.764925 |
| 20            | 7             | 0           | 1.766976                | -0.424736 | -1.040881 |
| 21            | 8             | 0           | 2.030647                | -0.475252 | -2.333243 |
| 22            | 8             | 0           | 2.157450                | 0.685357  | -0.377824 |
| 23            | 1             | 0           | 0.988459                | -1.152122 | 0.669135  |
| 24            | 1             | 0           | 0.926417                | -3.460260 | 0.969145  |
| 25            | 1             | 0           | -0.191161               | -4.436979 | 0.038591  |
| 26            | 1             | 0           | -0.744902               | -2.967566 | 0.858023  |
| 27            | 1             | 0           | 2.350259                | -3.582607 | -1.105361 |
| 28            | 1             | 0           | 1.904859                | -2.775635 | -2.582681 |
| 29            | 1             | 0           | 1.136298                | -4.315621 | -2.128899 |
| 30            | 6             | 0           | 4.630142                | -0.133647 | 0.524904  |
| 31            | 7             | 0           | 4.265732                | -0.870476 | 1.520220  |
| 32            | 6             | 0           | 5.073653                | -0.491469 | -0.859056 |
| 33            | 1             | 0           | 4.630538                | 0.924334  | 0.746047  |
| 34            | 1             | 0           | 5.237557                | -1.549702 | -1.001631 |

|    |    |   |           |           |           |
|----|----|---|-----------|-----------|-----------|
| 35 | 1  | 0 | 4.306668  | -0.155660 | -1.556328 |
| 36 | 1  | 0 | 5.980769  | 0.067892  | -1.082597 |
| 37 | 6  | 0 | -2.768938 | 1.244982  | -1.444903 |
| 38 | 6  | 0 | -1.571270 | 0.255187  | -1.339438 |
| 39 | 6  | 0 | -4.011785 | 0.725905  | -2.153147 |
| 40 | 6  | 0 | -1.923670 | -1.269423 | -1.163520 |
| 41 | 6  | 0 | -4.414229 | -0.579672 | -1.479551 |
| 42 | 6  | 0 | -3.325856 | -1.626446 | -1.723913 |
| 43 | 1  | 0 | -3.052612 | 1.521887  | -0.436344 |
| 44 | 1  | 0 | -2.381431 | 2.140622  | -1.926400 |
| 45 | 1  | 0 | -1.008573 | 0.357127  | -2.260528 |
| 46 | 1  | 0 | -4.803391 | 1.468624  | -2.078363 |
| 47 | 1  | 0 | -3.834162 | 0.557866  | -3.217929 |
| 48 | 1  | 0 | -1.901281 | -1.501857 | -0.107870 |
| 49 | 1  | 0 | -5.350005 | -0.964647 | -1.881489 |
| 50 | 1  | 0 | -4.558501 | -0.414703 | -0.413778 |
| 51 | 1  | 0 | -3.652805 | -2.567414 | -1.296088 |
| 52 | 1  | 0 | -3.271709 | -1.763634 | -2.803903 |
| 53 | 6  | 0 | 0.512448  | 1.417149  | 3.046819  |
| 54 | 6  | 0 | 1.766144  | 1.096633  | 3.579880  |
| 55 | 6  | 0 | -0.446185 | 2.024269  | 3.866410  |
| 56 | 6  | 0 | 2.050337  | 1.399765  | 4.910632  |
| 57 | 1  | 0 | 2.506130  | 0.613614  | 2.959679  |
| 58 | 6  | 0 | -0.142796 | 2.295888  | 5.196100  |
| 59 | 1  | 0 | -1.405956 | 2.285572  | 3.464656  |
| 60 | 6  | 0 | 1.103199  | 1.991888  | 5.738495  |
| 61 | 1  | 0 | 1.333126  | 2.227794  | 6.761535  |
| 62 | 6  | 0 | -1.186681 | 2.907898  | 6.068602  |
| 63 | 6  | 0 | 3.389270  | 1.045126  | 5.461777  |
| 64 | 9  | 0 | -2.044096 | 3.738734  | 5.373179  |
| 65 | 9  | 0 | -1.995060 | 1.961416  | 6.687767  |
| 66 | 9  | 0 | 3.665285  | 1.688797  | 6.651482  |
| 67 | 9  | 0 | 3.515453  | -0.317532 | 5.735092  |
| 68 | 9  | 0 | 4.424376  | 1.345242  | 4.596763  |
| 69 | 8  | 0 | 4.411768  | -3.199466 | 0.295053  |
| 70 | 16 | 0 | 4.077531  | -2.518515 | 1.559627  |
| 71 | 8  | 0 | 2.732167  | -2.745062 | 2.100216  |
| 72 | 6  | 0 | 5.273715  | -2.984625 | 2.764429  |
| 73 | 6  | 0 | 6.406038  | -3.693765 | 2.360575  |
| 74 | 6  | 0 | 5.060141  | -2.647475 | 4.102626  |
| 75 | 6  | 0 | 7.347893  | -4.066882 | 3.320374  |
| 76 | 1  | 0 | 6.534647  | -3.954624 | 1.324689  |
| 77 | 6  | 0 | 6.009542  | -3.021498 | 5.052075  |
| 78 | 1  | 0 | 4.177610  | -2.109802 | 4.396769  |

|    |   |   |           |           |          |
|----|---|---|-----------|-----------|----------|
| 79 | 6 | 0 | 7.151527  | -3.728589 | 4.662058 |
| 80 | 1 | 0 | 8.224265  | -4.617588 | 3.023501 |
| 81 | 1 | 0 | 5.857941  | -2.760632 | 6.085286 |
| 82 | 9 | 0 | -0.642616 | 3.662163  | 7.092998 |
| 83 | 1 | 0 | 7.882073  | -4.016124 | 5.399971 |

**Table 12.** Atom coordinates and two energies of **5-s-TS1** (E= -3095.9065 a.u., G= -3096.0314 a.u.)

| Center Number | Atomic Number | Atomic Type | Coordinates (Angstroms) |           |           |
|---------------|---------------|-------------|-------------------------|-----------|-----------|
|               |               |             | X                       | Y         | Z         |
| 1             | 7             | 0           | 0.195978                | 0.001643  | 0.348953  |
| 2             | 6             | 0           | -0.252415               | 0.303533  | 1.609344  |
| 3             | 7             | 0           | 0.745503                | 0.261863  | 2.547759  |
| 4             | 16            | 0           | -1.871417               | 0.602698  | 1.966131  |
| 5             | 7             | 0           | -1.378460               | -2.438666 | -1.628998 |
| 6             | 6             | 0           | -2.506669               | -3.411564 | -1.378422 |
| 7             | 6             | 0           | -1.325709               | -2.169751 | -3.110670 |
| 8             | 1             | 0           | 1.190397                | -0.135601 | 0.234780  |
| 9             | 1             | 0           | 1.578422                | -0.291297 | 2.334155  |
| 10            | 1             | 0           | -2.367039               | -4.290744 | -1.987043 |
| 11            | 1             | 0           | -3.449873               | -2.961918 | -1.642943 |
| 12            | 1             | 0           | -2.528078               | -3.687130 | -0.333104 |
| 13            | 1             | 0           | -0.956807               | -3.045139 | -3.625198 |
| 14            | 1             | 0           | -0.665531               | -1.340242 | -3.321540 |
| 15            | 1             | 0           | -2.314312               | -1.935907 | -3.479224 |
| 16            | 6             | 0           | 0.062343                | -3.232081 | -1.178341 |
| 17            | 6             | 0           | 1.237038                | -2.499755 | -1.780813 |
| 18            | 6             | 0           | 0.120452                | -3.212617 | 0.348668  |
| 19            | 6             | 0           | -0.043847               | -4.704813 | -1.616261 |
| 20            | 7             | 0           | 1.552694                | -2.622267 | -3.148892 |
| 21            | 8             | 0           | 1.303343                | -3.686255 | -3.813280 |
| 22            | 8             | 0           | 2.213048                | -1.656786 | -3.667148 |
| 23            | 1             | 0           | 1.338901                | -1.475078 | -1.500532 |
| 24            | 1             | 0           | 0.913667                | -3.875924 | 0.674856  |
| 25            | 1             | 0           | -0.800176               | -3.587660 | 0.786041  |
| 26            | 1             | 0           | 0.325281                | -2.238167 | 0.759535  |
| 27            | 1             | 0           | 0.951876                | -5.127083 | -1.547026 |
| 28            | 1             | 0           | -0.354763               | -4.854761 | -2.640236 |
| 29            | 1             | 0           | -0.683580               | -5.262493 | -0.941011 |
| 30            | 6             | 0           | 3.175835                | -2.695092 | -1.033164 |
| 31            | 7             | 0           | 3.214199                | -1.981438 | 0.115883  |
| 32            | 6             | 0           | 3.557095                | -4.153149 | -1.173279 |

|    |    |   |           |           |           |
|----|----|---|-----------|-----------|-----------|
| 33 | 1  | 0 | 3.448503  | -2.090055 | -1.887909 |
| 34 | 1  | 0 | 3.114649  | -4.779142 | -0.409040 |
| 35 | 1  | 0 | 3.294197  | -4.515760 | -2.161576 |
| 36 | 1  | 0 | 4.641627  | -4.228023 | -1.072293 |
| 37 | 6  | 0 | -1.049666 | 1.447398  | -1.216123 |
| 38 | 6  | 0 | -0.625887 | -0.005892 | -0.877650 |
| 39 | 6  | 0 | -2.298129 | 1.544656  | -2.084824 |
| 40 | 6  | 0 | -1.744115 | -1.106895 | -0.817685 |
| 41 | 6  | 0 | -3.434034 | 0.856494  | -1.336585 |
| 42 | 6  | 0 | -3.179167 | -0.652681 | -1.236922 |
| 43 | 1  | 0 | -1.243881 | 1.978931  | -0.292482 |
| 44 | 1  | 0 | -0.195802 | 1.925127  | -1.692538 |
| 45 | 1  | 0 | 0.052991  | -0.281529 | -1.670669 |
| 46 | 1  | 0 | -2.531886 | 2.591704  | -2.264977 |
| 47 | 1  | 0 | -2.145775 | 1.084366  | -3.064229 |
| 48 | 1  | 0 | -1.793513 | -1.451065 | 0.204275  |
| 49 | 1  | 0 | -4.387308 | 0.999194  | -1.843407 |
| 50 | 1  | 0 | -3.521979 | 1.291594  | -0.346342 |
| 51 | 1  | 0 | -3.885998 | -1.080001 | -0.531039 |
| 52 | 1  | 0 | -3.429419 | -1.053931 | -2.213409 |
| 53 | 6  | 0 | 0.664946  | 0.639654  | 3.904760  |
| 54 | 6  | 0 | -0.057598 | 1.755213  | 4.340252  |
| 55 | 6  | 0 | 1.409476  | -0.098212 | 4.830970  |
| 56 | 6  | 0 | -0.048944 | 2.098248  | 5.688391  |
| 57 | 1  | 0 | -0.612881 | 2.345999  | 3.638311  |
| 58 | 6  | 0 | 1.410526  | 0.274272  | 6.173402  |
| 59 | 1  | 0 | 1.978887  | -0.946512 | 4.491378  |
| 60 | 6  | 0 | 0.678724  | 1.367022  | 6.623960  |
| 61 | 1  | 0 | 0.681600  | 1.644007  | 7.662621  |
| 62 | 6  | 0 | 2.244265  | -0.505927 | 7.133464  |
| 63 | 6  | 0 | -0.863041 | 3.261206  | 6.145507  |
| 64 | 9  | 0 | 1.876161  | -0.296566 | 8.448644  |
| 65 | 9  | 0 | 2.177309  | -1.868972 | 6.912144  |
| 66 | 9  | 0 | -2.158723 | 2.906282  | 6.504673  |
| 67 | 9  | 0 | -0.323296 | 3.879904  | 7.258544  |
| 68 | 9  | 0 | -0.995950 | 4.234106  | 5.172623  |
| 69 | 8  | 0 | 2.914071  | -3.931478 | 1.807055  |
| 70 | 16 | 0 | 3.403890  | -2.552791 | 1.603429  |
| 71 | 8  | 0 | 2.821059  | -1.517958 | 2.488575  |
| 72 | 6  | 0 | 5.144421  | -2.570588 | 1.918246  |
| 73 | 6  | 0 | 5.776884  | -3.784249 | 2.187929  |
| 74 | 6  | 0 | 5.858344  | -1.368963 | 1.902620  |
| 75 | 6  | 0 | 7.150964  | -3.794782 | 2.439036  |
| 76 | 1  | 0 | 5.199109  | -4.691411 | 2.213833  |



|    |   |   |          |           |          |
|----|---|---|----------|-----------|----------|
| 77 | 6 | 0 | 7.228536 | -1.389426 | 2.153250 |
| 78 | 1 | 0 | 5.351554 | -0.441066 | 1.702574 |
| 79 | 6 | 0 | 7.875589 | -2.601523 | 2.420075 |
| 80 | 1 | 0 | 7.647142 | -4.725927 | 2.654232 |
| 81 | 1 | 0 | 7.787313 | -0.469090 | 2.145783 |
| 82 | 9 | 0 | 3.594152 | -0.179412 | 7.058937 |
| 83 | 1 | 0 | 8.934665 | -2.612363 | 2.617186 |

**Table 13.** Atom coordinates and two energies of **5-s-Int2** (E= -3095.9294 a.u., G=-3096.0491 a.u.)

| Center<br>Number | Atomic<br>Number | Atomic<br>Type | Coordinates (Angstroms) |           |           |
|------------------|------------------|----------------|-------------------------|-----------|-----------|
|                  |                  |                | X                       | Y         | Z         |
| 1                | 7                | 0              | -0.516438               | 0.209896  | 0.095134  |
| 2                | 6                | 0              | -0.292259               | -0.207082 | 1.382426  |
| 3                | 7                | 0              | 0.998906                | 0.131844  | 1.759716  |
| 4                | 16               | 0              | -1.393015               | -1.084658 | 2.287366  |
| 5                | 7                | 0              | -1.196183               | -2.153287 | -2.323029 |
| 6                | 6                | 0              | -1.815664               | -3.508439 | -2.621805 |
| 7                | 6                | 0              | -1.484090               | -1.314242 | -3.546420 |
| 8                | 1                | 0              | 0.082986                | 0.962523  | -0.205446 |
| 9                | 1                | 0              | 1.739317                | -0.238872 | 1.106978  |
| 10               | 1                | 0              | -1.243670               | -3.996055 | -3.392901 |
| 11               | 1                | 0              | -2.822744               | -3.376035 | -2.982464 |
| 12               | 1                | 0              | -1.830377               | -4.120346 | -1.733878 |
| 13               | 1                | 0              | -1.011782               | -1.758414 | -4.410025 |
| 14               | 1                | 0              | -1.133386               | -0.303673 | -3.435973 |
| 15               | 1                | 0              | -2.553498               | -1.288053 | -3.708106 |
| 16               | 6                | 0              | 0.452788                | -2.458929 | -2.130908 |
| 17               | 6                | 0              | 1.195371                | -1.122682 | -1.926066 |
| 18               | 6                | 0              | 0.590130                | -3.302462 | -0.864848 |
| 19               | 6                | 0              | 0.958270                | -3.275466 | -3.332884 |
| 20               | 7                | 0              | 1.144743                | -0.197841 | -3.107031 |
| 21               | 8                | 0              | 1.469694                | -0.589493 | -4.249224 |
| 22               | 8                | 0              | 0.813165                | 0.995958  | -2.855813 |
| 23               | 1                | 0              | 0.669937                | -0.589136 | -1.163824 |
| 24               | 1                | 0              | 1.624411                | -3.615509 | -0.752576 |
| 25               | 1                | 0              | -0.004360               | -4.207610 | -0.926669 |
| 26               | 1                | 0              | 0.341306                | -2.762251 | 0.038569  |
| 27               | 1                | 0              | 2.036538                | -3.197764 | -3.340638 |
| 28               | 1                | 0              | 0.625495                | -2.922463 | -4.300308 |
| 29               | 1                | 0              | 0.722714                | -4.327538 | -3.220465 |
| 30               | 6                | 0              | 2.711135                | -1.027754 | -1.398846 |

|    |    |   |           |           |           |
|----|----|---|-----------|-----------|-----------|
| 31 | 7  | 0 | 2.714413  | -1.311416 | 0.045099  |
| 32 | 6  | 0 | -2.859609 | 0.820937  | -0.171971 |
| 33 | 6  | 0 | -1.692889 | -0.025452 | -0.760975 |
| 34 | 6  | 0 | -4.261847 | 0.404419  | -0.594404 |
| 35 | 6  | 0 | -1.969372 | -1.546305 | -1.034052 |
| 36 | 6  | 0 | -4.417809 | -1.078568 | -0.282922 |
| 37 | 6  | 0 | -3.477884 | -1.885770 | -1.181464 |
| 38 | 1  | 0 | -2.805897 | 0.750364  | 0.907906  |
| 39 | 1  | 0 | -2.656954 | 1.856314  | -0.439024 |
| 40 | 1  | 0 | -1.430951 | 0.443977  | -1.701884 |
| 41 | 1  | 0 | -4.989683 | 0.999463  | -0.047623 |
| 42 | 1  | 0 | -4.438666 | 0.586253  | -1.656790 |
| 43 | 1  | 0 | -1.575612 | -2.118901 | -0.208254 |
| 44 | 1  | 0 | -5.434285 | -1.419796 | -0.469567 |
| 45 | 1  | 0 | -4.199607 | -1.259687 | 0.766946  |
| 46 | 1  | 0 | -3.623194 | -2.940080 | -0.974315 |
| 47 | 1  | 0 | -3.812729 | -1.706663 | -2.201848 |
| 48 | 6  | 0 | 1.431975  | 0.565896  | 3.018770  |
| 49 | 6  | 0 | 2.810152  | 0.794470  | 3.171782  |
| 50 | 6  | 0 | 0.580161  | 0.863348  | 4.086079  |
| 51 | 6  | 0 | 3.306614  | 1.291759  | 4.366221  |
| 52 | 1  | 0 | 3.476115  | 0.587932  | 2.352829  |
| 53 | 6  | 0 | 1.107123  | 1.364565  | 5.275964  |
| 54 | 1  | 0 | -0.477066 | 0.705516  | 3.997351  |
| 55 | 6  | 0 | 2.467181  | 1.583564  | 5.441495  |
| 56 | 1  | 0 | 2.858279  | 1.974750  | 6.363650  |
| 57 | 6  | 0 | 0.171528  | 1.630064  | 6.406771  |
| 58 | 6  | 0 | 4.768619  | 1.539829  | 4.528066  |
| 59 | 9  | 0 | -1.020487 | 2.198646  | 5.988759  |
| 60 | 9  | 0 | -0.189074 | 0.473016  | 7.089883  |
| 61 | 9  | 0 | 5.050146  | 2.874823  | 4.789138  |
| 62 | 9  | 0 | 5.308762  | 0.838065  | 5.599193  |
| 63 | 9  | 0 | 5.506486  | 1.194698  | 3.419420  |
| 64 | 8  | 0 | 5.174178  | -2.009874 | 0.428111  |
| 65 | 16 | 0 | 3.757235  | -2.403626 | 0.589128  |
| 66 | 8  | 0 | 3.444889  | -3.765630 | 0.064968  |
| 67 | 6  | 0 | 3.444311  | -2.432293 | 2.332510  |
| 68 | 6  | 0 | 4.508536  | -2.174437 | 3.196670  |
| 69 | 6  | 0 | 2.191195  | -2.792655 | 2.830506  |
| 70 | 6  | 0 | 4.310955  | -2.265725 | 4.576313  |
| 71 | 1  | 0 | 5.467209  | -1.911050 | 2.786059  |
| 72 | 6  | 0 | 1.995140  | -2.869981 | 4.208101  |
| 73 | 1  | 0 | 1.378123  | -3.006929 | 2.160454  |
| 74 | 6  | 0 | 3.055646  | -2.608643 | 5.082590  |

|    |   |   |          |           |           |
|----|---|---|----------|-----------|-----------|
| 75 | 1 | 0 | 5.129320 | -2.063277 | 5.246038  |
| 76 | 1 | 0 | 1.023686 | -3.127099 | 4.594699  |
| 77 | 9 | 0 | 0.705513 | 2.478971  | 7.355426  |
| 78 | 1 | 0 | 2.902450 | -2.671182 | 6.147320  |
| 79 | 6 | 0 | 3.758380 | -1.717942 | -2.289717 |
| 80 | 1 | 0 | 4.742646 | -1.378501 | -1.984701 |
| 81 | 1 | 0 | 3.756753 | -2.796952 | -2.185906 |
| 82 | 1 | 0 | 3.611695 | -1.447592 | -3.332172 |
| 83 | 1 | 0 | 2.888993 | 0.044520  | -1.505936 |

**Table 14.** Atom coordinates and two energies of **5-s-TS2** (E= -3095.8923 a.u., G= -3096.0095 a.u.)

| Center<br>Number | Atomic<br>Number | Atomic<br>Type | Coordinates (Angstroms) |           |           |
|------------------|------------------|----------------|-------------------------|-----------|-----------|
|                  |                  |                | X                       | Y         | Z         |
| 1                | 7                | 0              | 0.000000                | 0.000000  | 0.000000  |
| 2                | 6                | 0              | 0.000000                | 0.000000  | 1.361848  |
| 3                | 7                | 0              | 1.282911                | 0.000000  | 1.860101  |
| 4                | 16               | 0              | -1.403695               | -0.007545 | 2.286921  |
| 5                | 7                | 0              | -2.168706               | -2.156522 | -1.876527 |
| 6                | 6                | 0              | -3.100076               | -3.264807 | -1.462436 |
| 7                | 6                | 0              | -2.690344               | -1.537597 | -3.131242 |
| 8                | 1                | 0              | 0.887909                | -0.103907 | -0.457875 |
| 9                | 1                | 0              | 2.013757                | 0.012617  | 1.157354  |
| 10               | 1                | 0              | -3.281927               | -3.924033 | -2.295780 |
| 11               | 1                | 0              | -4.052070               | -2.872389 | -1.143142 |
| 12               | 1                | 0              | -2.655900               | -3.816651 | -0.645660 |
| 13               | 1                | 0              | -2.654847               | -2.257451 | -3.939142 |
| 14               | 1                | 0              | -2.101933               | -0.676822 | -3.412424 |
| 15               | 1                | 0              | -3.722204               | -1.228996 | -3.004702 |
| 16               | 6                | 0              | -0.564550               | -3.097167 | -2.227082 |
| 17               | 6                | 0              | 0.330980                | -2.166066 | -3.113478 |
| 18               | 6                | 0              | 0.044149                | -3.312099 | -0.900492 |
| 19               | 6                | 0              | -1.067416               | -4.333945 | -2.989604 |
| 20               | 7                | 0              | 0.008256                | -2.158007 | -4.596709 |
| 21               | 8                | 0              | 0.196422                | -3.188474 | -5.283251 |
| 22               | 8                | 0              | -0.385627               | -1.068156 | -5.082530 |
| 23               | 1                | 0              | 0.154823                | -1.143118 | -2.837265 |
| 24               | 1                | 0              | 0.968521                | -3.879170 | -0.983380 |
| 25               | 1                | 0              | -0.612251               | -3.861958 | -0.228906 |
| 26               | 1                | 0              | 1.547828                | -2.158008 | -0.930553 |
| 27               | 1                | 0              | -0.184432               | -4.792278 | -3.424108 |
| 28               | 1                | 0              | -1.755008               | -4.162646 | -3.815071 |

|    |    |   |           |           |           |
|----|----|---|-----------|-----------|-----------|
| 29 | 1  | 0 | -1.485716 | -5.053160 | -2.299362 |
| 30 | 6  | 0 | 1.881727  | -2.345087 | -3.005838 |
| 31 | 7  | 0 | 2.219562  | -1.823366 | -1.671537 |
| 32 | 6  | 0 | -1.733657 | 1.517510  | -0.845746 |
| 33 | 6  | 0 | -1.165549 | 0.072093  | -0.893122 |
| 34 | 6  | 0 | -3.226580 | 1.621566  | -1.133346 |
| 35 | 6  | 0 | -2.152545 | -1.126329 | -0.682343 |
| 36 | 6  | 0 | -3.946038 | 0.753482  | -0.107885 |
| 37 | 6  | 0 | -3.628868 | -0.731173 | -0.333352 |
| 38 | 1  | 0 | -1.560979 | 1.916990  | 0.147926  |
| 39 | 1  | 0 | -1.150396 | 2.122986  | -1.536973 |
| 40 | 1  | 0 | -0.743216 | -0.030693 | -1.882875 |
| 41 | 1  | 0 | -3.539345 | 2.660583  | -1.050066 |
| 42 | 1  | 0 | -3.466719 | 1.303150  | -2.150264 |
| 43 | 1  | 0 | -1.737914 | -1.713874 | 0.123561  |
| 44 | 1  | 0 | -5.026560 | 0.876991  | -0.171807 |
| 45 | 1  | 0 | -3.641726 | 1.059741  | 0.887444  |
| 46 | 1  | 0 | -3.922697 | -1.291537 | 0.549797  |
| 47 | 1  | 0 | -4.294819 | -1.038492 | -1.133287 |
| 48 | 6  | 0 | 1.789865  | -0.131391 | 3.160004  |
| 49 | 6  | 0 | 3.177611  | -0.331860 | 3.244718  |
| 50 | 6  | 0 | 1.049028  | -0.072017 | 4.348002  |
| 51 | 6  | 0 | 3.795209  | -0.495044 | 4.478281  |
| 52 | 1  | 0 | 3.760534  | -0.358150 | 2.338500  |
| 53 | 6  | 0 | 1.697726  | -0.233697 | 5.570652  |
| 54 | 1  | 0 | -0.007916 | 0.100279  | 4.308094  |
| 55 | 6  | 0 | 3.067729  | -0.452466 | 5.663530  |
| 56 | 1  | 0 | 3.548866  | -0.576629 | 6.615996  |
| 57 | 6  | 0 | 0.875814  | -0.211916 | 6.817148  |
| 58 | 6  | 0 | 5.268808  | -0.721881 | 4.505203  |
| 59 | 9  | 0 | 1.626720  | 0.075311  | 7.941446  |
| 60 | 9  | 0 | -0.144439 | 0.717626  | 6.769627  |
| 61 | 9  | 0 | 5.653822  | -1.760514 | 3.661648  |
| 62 | 9  | 0 | 5.995457  | 0.381190  | 4.082749  |
| 63 | 9  | 0 | 5.740730  | -1.043134 | 5.759347  |
| 64 | 8  | 0 | 3.249634  | -0.269950 | -0.099911 |
| 65 | 16 | 0 | 3.564556  | -0.991265 | -1.347234 |
| 66 | 8  | 0 | 3.946994  | -0.245808 | -2.544916 |
| 67 | 6  | 0 | 4.889376  | -2.097801 | -0.967050 |
| 68 | 6  | 0 | 5.917369  | -2.272085 | -1.895057 |
| 69 | 6  | 0 | 4.899240  | -2.765061 | 0.260844  |
| 70 | 6  | 0 | 6.964904  | -3.143124 | -1.590949 |
| 71 | 1  | 0 | 5.905143  | -1.722285 | -2.819848 |
| 72 | 6  | 0 | 5.951717  | -3.628291 | 0.557371  |

|    |   |   |          |           |           |
|----|---|---|----------|-----------|-----------|
| 73 | 1 | 0 | 4.114310 | -2.605743 | 0.979941  |
| 74 | 6 | 0 | 6.981489 | -3.820858 | -0.369544 |
| 75 | 1 | 0 | 7.766086 | -3.280565 | -2.296854 |
| 76 | 1 | 0 | 5.974627 | -4.132551 | 1.507712  |
| 77 | 9 | 0 | 0.261994 | -1.433737 | 7.073375  |
| 78 | 1 | 0 | 7.796556 | -4.484685 | -0.134660 |
| 79 | 6 | 0 | 2.453117 | -3.739228 | -3.284592 |
| 80 | 1 | 0 | 3.537640 | -3.691334 | -3.229871 |
| 81 | 1 | 0 | 2.115493 | -4.472749 | -2.560915 |
| 82 | 1 | 0 | 2.181352 | -4.075657 | -4.279343 |
| 83 | 1 | 0 | 2.302761 | -1.655541 | -3.735903 |

**Table 15.** Atom coordinates and two energies of **5-s-Int3** (E= -3095.9637 a.u., G= -3096.0963 a.u.)

| Center<br>Number | Atomic<br>Number | Atomic<br>Type | Coordinates (Angstroms) |           |           |
|------------------|------------------|----------------|-------------------------|-----------|-----------|
|                  |                  |                | X                       | Y         | Z         |
| 1                | 7                | 0              | -1.293132               | 0.706645  | -0.148975 |
| 2                | 6                | 0              | -1.529912               | 0.381940  | 1.143375  |
| 3                | 7                | 0              | -0.338523               | 0.303146  | 1.863973  |
| 4                | 16               | 0              | -3.038058               | 0.067481  | 1.812151  |
| 5                | 7                | 0              | -1.951544               | -1.615737 | -1.791510 |
| 6                | 6                | 0              | -2.467657               | -2.941402 | -1.452661 |
| 7                | 6                | 0              | -1.211241               | -1.609351 | -3.052271 |
| 8                | 1                | 0              | -0.328394               | 0.789607  | -0.424769 |
| 9                | 1                | 0              | 0.501936                | 0.287599  | 1.308118  |
| 10               | 1                | 0              | -1.650117               | -3.660316 | -1.437920 |
| 11               | 1                | 0              | -3.219347               | -3.312671 | -2.162151 |
| 12               | 1                | 0              | -2.913199               | -2.918901 | -0.462334 |
| 13               | 1                | 0              | -0.381968               | -2.310701 | -2.985847 |
| 14               | 1                | 0              | -0.788134               | -0.628513 | -3.249190 |
| 15               | 1                | 0              | -1.818400               | -1.899714 | -3.918270 |
| 16               | 6                | 0              | 2.451630                | -2.562169 | 0.206067  |
| 17               | 6                | 0              | 3.242574                | -1.502029 | -0.547829 |
| 18               | 6                | 0              | 2.927642                | -2.982948 | 1.384048  |
| 19               | 6                | 0              | 1.173857                | -3.091184 | -0.396908 |
| 20               | 7                | 0              | 2.270699                | -0.511104 | -1.158395 |
| 21               | 8                | 0              | 2.102935                | -0.471626 | -2.389061 |
| 22               | 8                | 0              | 1.657265                | 0.243926  | -0.354572 |
| 23               | 1                | 0              | 3.786272                | -0.898801 | 0.170155  |
| 24               | 1                | 0              | 3.816747                | -2.568957 | 1.831714  |
| 25               | 1                | 0              | 2.429392                | -3.759867 | 1.940332  |
| 26               | 1                | 0              | 5.509353                | -3.450736 | -0.631307 |

|    |    |   |           |           |           |
|----|----|---|-----------|-----------|-----------|
| 27 | 1  | 0 | 1.332814  | -3.511447 | -1.386928 |
| 28 | 1  | 0 | 0.411372  | -2.317464 | -0.492833 |
| 29 | 1  | 0 | 0.761514  | -3.870522 | 0.236248  |
| 30 | 6  | 0 | 4.266091  | -2.007486 | -1.606375 |
| 31 | 7  | 0 | 5.447753  | -2.479310 | -0.884327 |
| 32 | 6  | 0 | 3.773628  | -3.109714 | -2.542934 |
| 33 | 1  | 0 | 4.568940  | -1.155965 | -2.209581 |
| 34 | 1  | 0 | 3.540931  | -4.021515 | -1.996736 |
| 35 | 1  | 0 | 2.892040  | -2.790617 | -3.087539 |
| 36 | 1  | 0 | 4.556445  | -3.334172 | -3.261010 |
| 37 | 6  | 0 | -3.255956 | 1.952927  | -1.057420 |
| 38 | 6  | 0 | -2.246765 | 0.808504  | -1.264741 |
| 39 | 6  | 0 | -4.201113 | 2.096804  | -2.255571 |
| 40 | 6  | 0 | -2.935835 | -0.531645 | -1.602457 |
| 41 | 6  | 0 | -4.916823 | 0.772151  | -2.542712 |
| 42 | 6  | 0 | -3.893496 | -0.340765 | -2.798231 |
| 43 | 1  | 0 | -3.834329 | 1.761999  | -0.159397 |
| 44 | 1  | 0 | -2.702429 | 2.876529  | -0.893658 |
| 45 | 1  | 0 | -1.626116 | 1.082322  | -2.119193 |
| 46 | 1  | 0 | -4.924810 | 2.885029  | -2.053518 |
| 47 | 1  | 0 | -3.640901 | 2.403185  | -3.142337 |
| 48 | 1  | 0 | -3.531286 | -0.806143 | -0.737193 |
| 49 | 1  | 0 | -5.575405 | 0.875385  | -3.404356 |
| 50 | 1  | 0 | -5.545447 | 0.507565  | -1.691140 |
| 51 | 1  | 0 | -4.402128 | -1.282583 | -3.002719 |
| 52 | 1  | 0 | -3.323307 | -0.088135 | -3.693783 |
| 53 | 6  | 0 | -0.116077 | 0.158512  | 3.239737  |
| 54 | 6  | 0 | 1.123344  | -0.367293 | 3.628263  |
| 55 | 6  | 0 | -1.014164 | 0.564681  | 4.236690  |
| 56 | 6  | 0 | 1.451066  | -0.488193 | 4.975042  |
| 57 | 1  | 0 | 1.816447  | -0.700897 | 2.874456  |
| 58 | 6  | 0 | -0.665863 | 0.422001  | 5.576774  |
| 59 | 1  | 0 | -1.970775 | 0.963643  | 3.962262  |
| 60 | 6  | 0 | 0.562319  | -0.100167 | 5.972033  |
| 61 | 1  | 0 | 0.807615  | -0.213824 | 7.012381  |
| 62 | 6  | 0 | -1.621271 | 0.901601  | 6.620205  |
| 63 | 6  | 0 | 2.794481  | -1.009943 | 5.351732  |
| 64 | 9  | 0 | -1.494455 | 2.265644  | 6.865461  |
| 65 | 9  | 0 | -2.940346 | 0.701690  | 6.273514  |
| 66 | 9  | 0 | 2.815707  | -1.601351 | 6.595688  |
| 67 | 9  | 0 | 3.277245  | -1.950203 | 4.452965  |
| 68 | 9  | 0 | 3.770533  | -0.012490 | 5.391550  |
| 69 | 8  | 0 | 6.951609  | -0.691677 | -1.788925 |
| 70 | 16 | 0 | 6.816165  | -1.599174 | -0.652276 |

|    |   |   |           |           |           |
|----|---|---|-----------|-----------|-----------|
| 71 | 8 | 0 | 7.836730  | -2.584777 | -0.311813 |
| 72 | 6 | 0 | 6.500716  | -0.595205 | 0.769532  |
| 73 | 6 | 0 | 6.154911  | 0.746998  | 0.601446  |
| 74 | 6 | 0 | 6.581343  | -1.168955 | 2.042251  |
| 75 | 6 | 0 | 5.853172  | 1.517447  | 1.727141  |
| 76 | 1 | 0 | 6.142259  | 1.178381  | -0.384507 |
| 77 | 6 | 0 | 6.271446  | -0.394042 | 3.158160  |
| 78 | 1 | 0 | 6.892773  | -2.193348 | 2.155748  |
| 79 | 6 | 0 | 5.899641  | 0.945987  | 3.000843  |
| 80 | 1 | 0 | 5.587920  | 2.554106  | 1.608542  |
| 81 | 1 | 0 | 6.316339  | -0.826282 | 4.142370  |
| 82 | 9 | 0 | -1.424943 | 0.280316  | 7.839240  |
| 83 | 1 | 0 | 5.653621  | 1.535215  | 3.867530  |

**Table 16.** Atom coordinates and two energies of **5-a-Int1** (E= -3095.9309 a.u., G= -3096.0586 a.u.)

| Center Number | Atomic Number | Atomic Type | Coordinates (Angstroms) |           |           |
|---------------|---------------|-------------|-------------------------|-----------|-----------|
|               |               |             | X                       | Y         | Z         |
| 1             | 7             | 0           | -0.514687               | 0.983211  | -0.492900 |
| 2             | 6             | 0           | -0.443632               | 0.816746  | 0.860864  |
| 3             | 7             | 0           | 0.862007                | 0.819081  | 1.280320  |
| 4             | 16            | 0           | -1.796852               | 0.618321  | 1.850778  |
| 5             | 7             | 0           | -1.782707               | -1.669439 | -2.213158 |
| 6             | 6             | 0           | -2.707201               | -2.867022 | -2.120039 |
| 7             | 6             | 0           | -1.807008               | -1.230722 | -3.656280 |
| 8             | 1             | 0           | 0.374605                | 1.138425  | -0.959053 |
| 9             | 1             | 0           | 1.554997                | 0.846137  | 0.529676  |
| 10            | 1             | 0           | -2.227484               | -3.718802 | -2.575026 |
| 11            | 1             | 0           | -3.623351               | -2.660562 | -2.652286 |
| 12            | 1             | 0           | -2.927907               | -3.084293 | -1.086509 |
| 13            | 1             | 0           | -1.758475               | -2.104042 | -4.292623 |
| 14            | 1             | 0           | -0.972536               | -0.589864 | -3.887584 |
| 15            | 1             | 0           | -2.728613               | -0.702469 | -3.858853 |
| 16            | 6             | 0           | -0.286730               | -2.193536 | -1.807680 |
| 17            | 6             | 0           | 0.621549                | -1.010943 | -1.979016 |
| 18            | 6             | 0           | -0.342683               | -2.737015 | -0.374544 |
| 19            | 6             | 0           | 0.168563                | -3.324645 | -2.754069 |
| 20            | 7             | 0           | 1.715185                | -0.793560 | -1.285521 |
| 21            | 8             | 0           | 2.327118                | -1.708407 | -0.577249 |
| 22            | 8             | 0           | 2.181007                | 0.475071  | -1.253203 |
| 23            | 1             | 0           | 0.366850                | -0.206666 | -2.630901 |
| 24            | 1             | 0           | 0.636651                | -3.111553 | -0.113634 |

|    |    |   |           |           |           |
|----|----|---|-----------|-----------|-----------|
| 25 | 1  | 0 | -1.032684 | -3.569695 | -0.287320 |
| 26 | 1  | 0 | -0.590455 | -1.984009 | 0.364288  |
| 27 | 1  | 0 | 1.208050  | -3.500997 | -2.491137 |
| 28 | 1  | 0 | 0.148420  | -3.043895 | -3.802324 |
| 29 | 1  | 0 | -0.357469 | -4.264052 | -2.610695 |
| 30 | 6  | 0 | 3.799888  | -2.693210 | 1.502457  |
| 31 | 7  | 0 | 3.207338  | -2.795494 | 2.643346  |
| 32 | 6  | 0 | -2.588508 | 2.120285  | -1.100766 |
| 33 | 6  | 0 | -1.698126 | 0.870674  | -1.348705 |
| 34 | 6  | 0 | -4.028554 | 2.000916  | -1.581011 |
| 35 | 6  | 0 | -2.399858 | -0.529934 | -1.245941 |
| 36 | 6  | 0 | -4.634514 | 0.758275  | -0.939413 |
| 37 | 6  | 0 | -3.934077 | -0.493180 | -1.476330 |
| 38 | 1  | 0 | -2.601764 | 2.312315  | -0.035077 |
| 39 | 1  | 0 | -2.079023 | 2.958532  | -1.572107 |
| 40 | 1  | 0 | -1.327101 | 0.978399  | -2.363815 |
| 41 | 1  | 0 | -4.577803 | 2.895257  | -1.294548 |
| 42 | 1  | 0 | -4.089771 | 1.928649  | -2.670243 |
| 43 | 1  | 0 | -2.219417 | -0.917147 | -0.254208 |
| 44 | 1  | 0 | -5.696521 | 0.671520  | -1.162766 |
| 45 | 1  | 0 | -4.530931 | 0.818398  | 0.141519  |
| 46 | 1  | 0 | -4.383073 | -1.362909 | -1.008932 |
| 47 | 1  | 0 | -4.169663 | -0.544143 | -2.539000 |
| 48 | 6  | 0 | 1.417762  | 0.768280  | 2.571848  |
| 49 | 6  | 0 | 2.706852  | 1.292277  | 2.704647  |
| 50 | 6  | 0 | 0.800353  | 0.190073  | 3.688365  |
| 51 | 6  | 0 | 3.357488  | 1.262796  | 3.935473  |
| 52 | 1  | 0 | 3.191225  | 1.730216  | 1.847488  |
| 53 | 6  | 0 | 1.460055  | 0.199729  | 4.910614  |
| 54 | 1  | 0 | -0.166527 | -0.259470 | 3.598943  |
| 55 | 6  | 0 | 2.740827  | 0.727588  | 5.058510  |
| 56 | 1  | 0 | 3.236568  | 0.727493  | 6.012951  |
| 57 | 6  | 0 | 0.803944  | -0.389647 | 6.111985  |
| 58 | 6  | 0 | 4.746313  | 1.792488  | 4.028178  |
| 59 | 9  | 0 | -0.508296 | -0.738087 | 5.913151  |
| 60 | 9  | 0 | 1.450994  | -1.538799 | 6.570628  |
| 61 | 9  | 0 | 4.925792  | 2.955510  | 3.298004  |
| 62 | 9  | 0 | 5.128908  | 2.072349  | 5.324384  |
| 63 | 9  | 0 | 5.697666  | 0.900241  | 3.536120  |
| 64 | 8  | 0 | 1.631654  | -4.567357 | 1.566726  |
| 65 | 16 | 0 | 1.863381  | -3.782175 | 2.793796  |
| 66 | 8  | 0 | 0.777649  | -2.938432 | 3.296486  |
| 67 | 6  | 0 | 2.362606  | -4.897967 | 4.063843  |
| 68 | 6  | 0 | 2.781924  | -6.182951 | 3.715027  |



|    |   |   |          |           |          |
|----|---|---|----------|-----------|----------|
| 69 | 6 | 0 | 2.320262 | -4.480006 | 5.395111 |
| 70 | 6 | 0 | 3.176174 | -7.064166 | 4.722183 |
| 71 | 1 | 0 | 2.782580 | -6.484197 | 2.682040 |
| 72 | 6 | 0 | 2.717282 | -5.369017 | 6.394010 |
| 73 | 1 | 0 | 1.977086 | -3.492580 | 5.644501 |
| 74 | 6 | 0 | 3.146886 | -6.656521 | 6.059009 |
| 75 | 1 | 0 | 3.498748 | -8.059347 | 4.466732 |
| 76 | 1 | 0 | 2.688454 | -5.057775 | 7.424228 |
| 77 | 9 | 0 | 0.824575 | 0.479393  | 7.197666 |
| 78 | 1 | 0 | 3.451658 | -7.339317 | 6.834924 |
| 79 | 6 | 0 | 4.947114 | -1.769652 | 1.305495 |
| 80 | 1 | 0 | 5.808528 | -2.318764 | 0.925970 |
| 81 | 1 | 0 | 4.660960 | -1.051971 | 0.538499 |
| 82 | 1 | 0 | 5.213276 | -1.256272 | 2.221094 |
| 83 | 1 | 0 | 3.474066 | -3.267064 | 0.643054 |

**Table 17.** Atom coordinates and two energies of **5-a-TS1** (E= -3095.8991 a.u., G=-3096.0252 a.u.)

| Center Number | Atomic Number | Atomic Type | Coordinates (Angstroms) |           |           |
|---------------|---------------|-------------|-------------------------|-----------|-----------|
|               |               |             | X                       | Y         | Z         |
| 1             | 7             | 0           | 0.000000                | 0.000000  | 0.000000  |
| 2             | 6             | 0           | 0.000000                | 0.000000  | 1.369244  |
| 3             | 7             | 0           | 1.273708                | 0.000000  | 1.879030  |
| 4             | 16            | 0           | -1.401437               | -0.073291 | 2.302092  |
| 5             | 7             | 0           | -2.012524               | -2.191258 | -1.816232 |
| 6             | 6             | 0           | -2.915645               | -3.335438 | -1.409208 |
| 7             | 6             | 0           | -2.525957               | -1.689514 | -3.151026 |
| 8             | 1             | 0           | 0.904344                | 0.087715  | -0.439284 |
| 9             | 1             | 0           | 2.022196                | -0.218790 | 1.216247  |
| 10            | 1             | 0           | -3.097353               | -3.967121 | -2.266692 |
| 11            | 1             | 0           | -3.860736               | -2.949685 | -1.064970 |
| 12            | 1             | 0           | -2.461436               | -3.911210 | -0.617678 |
| 13            | 1             | 0           | -2.087153               | -2.255689 | -3.953818 |
| 14            | 1             | 0           | -2.266137               | -0.648345 | -3.286231 |
| 15            | 1             | 0           | -3.600827               | -1.797213 | -3.187765 |
| 16            | 6             | 0           | -0.465384               | -2.846458 | -2.017977 |
| 17            | 6             | 0           | 0.489680                | -1.859800 | -2.652004 |
| 18            | 6             | 0           | 0.058701                | -3.189833 | -0.617454 |
| 19            | 6             | 0           | -0.610269               | -4.140208 | -2.837924 |
| 20            | 7             | 0           | 0.243975                | -1.285845 | -3.910623 |
| 21            | 8             | 0           | -0.229203               | -1.985751 | -4.875587 |
| 22            | 8             | 0           | 0.606702                | -0.076771 | -4.087070 |

|    |    |   |           |           |           |
|----|----|---|-----------|-----------|-----------|
| 23 | 1  | 0 | 0.857996  | -1.102543 | -1.995739 |
| 24 | 1  | 0 | 1.054941  | -3.612508 | -0.694855 |
| 25 | 1  | 0 | -0.557991 | -3.929711 | -0.118853 |
| 26 | 1  | 0 | 0.142965  | -2.319620 | 0.016512  |
| 27 | 1  | 0 | 0.389044  | -4.549908 | -2.948762 |
| 28 | 1  | 0 | -0.989175 | -3.980917 | -3.838019 |
| 29 | 1  | 0 | -1.197741 | -4.893107 | -2.326674 |
| 30 | 6  | 0 | 2.445866  | -2.607894 | -2.983048 |
| 31 | 7  | 0 | 3.275641  | -1.705725 | -2.418633 |
| 32 | 6  | 0 | -1.727918 | 1.594329  | -0.703289 |
| 33 | 6  | 0 | -1.180472 | 0.146554  | -0.875947 |
| 34 | 6  | 0 | -3.206787 | 1.776952  | -1.028044 |
| 35 | 6  | 0 | -2.186699 | -1.046323 | -0.708633 |
| 36 | 6  | 0 | -3.989304 | 0.778786  | -0.183076 |
| 37 | 6  | 0 | -3.692030 | -0.642375 | -0.670184 |
| 38 | 1  | 0 | -1.581143 | 1.892888  | 0.328393  |
| 39 | 1  | 0 | -1.105016 | 2.239876  | -1.318700 |
| 40 | 1  | 0 | -0.788789 | 0.110232  | -1.884298 |
| 41 | 1  | 0 | -3.498951 | 2.799380  | -0.797784 |
| 42 | 1  | 0 | -3.410730 | 1.623099  | -2.090091 |
| 43 | 1  | 0 | -1.955795 | -1.542289 | 0.222577  |
| 44 | 1  | 0 | -5.063409 | 0.941479  | -0.256331 |
| 45 | 1  | 0 | -3.708595 | 0.893216  | 0.858868  |
| 46 | 1  | 0 | -4.232523 | -1.341955 | -0.039736 |
| 47 | 1  | 0 | -4.124195 | -0.704172 | -1.663224 |
| 48 | 6  | 0 | 1.686583  | 0.128688  | 3.217291  |
| 49 | 6  | 0 | 1.020567  | 0.919999  | 4.156558  |
| 50 | 6  | 0 | 2.872666  | -0.520686 | 3.589348  |
| 51 | 6  | 0 | 1.528527  | 1.033205  | 5.449148  |
| 52 | 1  | 0 | 0.122194  | 1.437115  | 3.883383  |
| 53 | 6  | 0 | 3.365010  | -0.380390 | 4.882275  |
| 54 | 1  | 0 | 3.389137  | -1.127370 | 2.863412  |
| 55 | 6  | 0 | 2.698012  | 0.391536  | 5.832547  |
| 56 | 1  | 0 | 3.078317  | 0.488131  | 6.833787  |
| 57 | 6  | 0 | 4.630783  | -1.050545 | 5.298688  |
| 58 | 6  | 0 | 0.761200  | 1.843042  | 6.439469  |
| 59 | 9  | 0 | 5.671317  | -0.147799 | 5.487247  |
| 60 | 9  | 0 | 4.497484  | -1.711471 | 6.512588  |
| 61 | 9  | 0 | 1.488204  | 2.122956  | 7.578661  |
| 62 | 9  | 0 | 0.344200  | 3.058064  | 5.921791  |
| 63 | 9  | 0 | -0.395635 | 1.202684  | 6.865160  |
| 64 | 8  | 0 | 3.350894  | -3.143781 | -0.291559 |
| 65 | 16 | 0 | 3.628957  | -1.804489 | -0.857205 |
| 66 | 8  | 0 | 2.982519  | -0.680712 | -0.111400 |

|    |   |   |          |           |           |
|----|---|---|----------|-----------|-----------|
| 67 | 6 | 0 | 5.363622 | -1.497495 | -0.803708 |
| 68 | 6 | 0 | 5.836973 | -0.256566 | -0.381528 |
| 69 | 6 | 0 | 6.238277 | -2.508202 | -1.210910 |
| 70 | 6 | 0 | 7.213832 | -0.026431 | -0.356451 |
| 71 | 1 | 0 | 5.141727 | 0.505405  | -0.077321 |
| 72 | 6 | 0 | 7.610715 | -2.269552 | -1.182331 |
| 73 | 1 | 0 | 5.858597 | -3.459585 | -1.544280 |
| 74 | 6 | 0 | 8.098918 | -1.030098 | -0.754965 |
| 75 | 1 | 0 | 7.589860 | 0.927630  | -0.028484 |
| 76 | 1 | 0 | 8.294161 | -3.042595 | -1.489986 |
| 77 | 9 | 0 | 5.080691 | -1.975383 | 4.383748  |
| 78 | 1 | 0 | 9.160807 | -0.849868 | -0.733223 |
| 79 | 6 | 0 | 2.561460 | -2.741982 | -4.475183 |
| 80 | 1 | 0 | 1.745397 | -3.302521 | -4.912152 |
| 81 | 1 | 0 | 2.622932 | -1.767773 | -4.948377 |
| 82 | 1 | 0 | 3.495850 | -3.268625 | -4.668113 |
| 83 | 1 | 0 | 2.238231 | -3.528669 | -2.447960 |

**Table 18.** Atom coordinates and two energies of **5-a-Int2** (E= -3095.9322 a.u., G=-3096.0544 a.u.)

| Center Number | Atomic Number | Atomic Type | Coordinates (Angstroms) |           |           |
|---------------|---------------|-------------|-------------------------|-----------|-----------|
|               |               |             | X                       | Y         | Z         |
| 1             | 7             | 0           | -0.079279               | 0.303919  | 0.500821  |
| 2             | 6             | 0           | -0.614666               | 0.242276  | 1.760457  |
| 3             | 7             | 0           | 0.335668                | 0.214006  | 2.737208  |
| 4             | 16            | 0           | -2.281517               | 0.123363  | 2.036652  |
| 5             | 7             | 0           | -1.144596               | -1.820835 | -2.103321 |
| 6             | 6             | 0           | -2.086411               | -3.009729 | -2.101321 |
| 7             | 6             | 0           | -1.190802               | -1.222906 | -3.485857 |
| 8             | 1             | 0           | 0.930222                | 0.185438  | 0.371718  |
| 9             | 1             | 0           | 1.304039                | 0.054890  | 2.433215  |
| 10            | 1             | 0           | -1.821825               | -3.685583 | -2.899040 |
| 11            | 1             | 0           | -3.095310               | -2.670031 | -2.262491 |
| 12            | 1             | 0           | -2.033494               | -3.517887 | -1.149640 |
| 13            | 1             | 0           | -0.702156               | -1.887702 | -4.185163 |
| 14            | 1             | 0           | -0.704859               | -0.259942 | -3.503638 |
| 15            | 1             | 0           | -2.216373               | -1.105881 | -3.800780 |
| 16            | 6             | 0           | 0.361721                | -2.404951 | -1.800595 |
| 17            | 6             | 0           | 1.452828                | -1.360193 | -2.238216 |
| 18            | 6             | 0           | 0.440134                | -2.750902 | -0.306646 |
| 19            | 6             | 0           | 0.549959                | -3.741426 | -2.553944 |
| 20            | 7             | 0           | 1.700139                | -1.332416 | -3.739766 |

|    |   |   |           |           |           |
|----|---|---|-----------|-----------|-----------|
| 21 | 8 | 0 | 2.113178  | -2.354144 | -4.332899 |
| 22 | 8 | 0 | 1.544161  | -0.223740 | -4.308673 |
| 23 | 1 | 0 | 1.146159  | -0.350827 | -2.048287 |
| 24 | 1 | 0 | 1.403138  | -3.197400 | -0.087136 |
| 25 | 1 | 0 | -0.315531 | -3.490882 | -0.059194 |
| 26 | 1 | 0 | 0.334522  | -1.903520 | 0.344774  |
| 27 | 1 | 0 | 1.603679  | -3.991685 | -2.516337 |
| 28 | 1 | 0 | 0.281368  | -3.724047 | -3.602795 |
| 29 | 1 | 0 | 0.013090  | -4.539137 | -2.056259 |
| 30 | 6 | 0 | 2.842933  | -1.468014 | -1.526960 |
| 31 | 7 | 0 | 2.637457  | -0.748606 | -0.260033 |
| 32 | 6 | 0 | -1.534737 | 1.860063  | -0.748688 |
| 33 | 6 | 0 | -0.861719 | 0.463226  | -0.730706 |
| 34 | 6 | 0 | -2.741473 | 1.950109  | -1.674528 |
| 35 | 6 | 0 | -1.767609 | -0.787032 | -1.011543 |
| 36 | 6 | 0 | -3.767359 | 0.930201  | -1.194713 |
| 37 | 6 | 0 | -3.254629 | -0.502905 | -1.396417 |
| 38 | 1 | 0 | -1.859051 | 2.105981  | 0.254801  |
| 39 | 1 | 0 | -0.764785 | 2.577236  | -1.024933 |
| 40 | 1 | 0 | -0.131007 | 0.523720  | -1.521639 |
| 41 | 1 | 0 | -3.153578 | 2.956098  | -1.636873 |
| 42 | 1 | 0 | -2.466397 | 1.764078  | -2.716337 |
| 43 | 1 | 0 | -1.767978 | -1.383010 | -0.112453 |
| 44 | 1 | 0 | -4.706711 | 1.025068  | -1.737476 |
| 45 | 1 | 0 | -3.977127 | 1.108591  | -0.145288 |
| 46 | 1 | 0 | -3.881761 | -1.177958 | -0.820848 |
| 47 | 1 | 0 | -3.429758 | -0.727564 | -2.442776 |
| 48 | 6 | 0 | 0.196146  | 0.170837  | 4.137563  |
| 49 | 6 | 0 | -0.892617 | 0.691169  | 4.843880  |
| 50 | 6 | 0 | 1.275609  | -0.372775 | 4.852483  |
| 51 | 6 | 0 | -0.897765 | 0.641459  | 6.236982  |
| 52 | 1 | 0 | -1.714983 | 1.132428  | 4.317514  |
| 53 | 6 | 0 | 1.245454  | -0.402309 | 6.241432  |
| 54 | 1 | 0 | 2.128566  | -0.746293 | 4.310662  |
| 55 | 6 | 0 | 0.157492  | 0.093905  | 6.956357  |
| 56 | 1 | 0 | 0.146491  | 0.077220  | 8.031205  |
| 57 | 6 | 0 | 2.381609  | -1.020489 | 6.985120  |
| 58 | 6 | 0 | -2.088613 | 1.166405  | 6.965671  |
| 59 | 9 | 0 | 2.545737  | -0.472833 | 8.245912  |
| 60 | 9 | 0 | 2.207298  | -2.385933 | 7.191371  |
| 61 | 9 | 0 | -1.796130 | 1.537955  | 8.264650  |
| 62 | 9 | 0 | -2.646956 | 2.272677  | 6.351083  |
| 63 | 9 | 0 | -3.116343 | 0.233622  | 7.062569  |
| 64 | 8 | 0 | 3.512447  | -2.724620 | 1.099436  |

|    |    |   |          |           |           |
|----|----|---|----------|-----------|-----------|
| 65 | 16 | 0 | 3.441334 | -1.247460 | 1.003790  |
| 66 | 8  | 0 | 2.841835 | -0.537620 | 2.166558  |
| 67 | 6  | 0 | 5.133031 | -0.697873 | 0.963301  |
| 68 | 6  | 0 | 5.405129 | 0.672655  | 0.924957  |
| 69 | 6  | 0 | 6.168034 | -1.632491 | 0.974172  |
| 70 | 6  | 0 | 6.727986 | 1.108457  | 0.887921  |
| 71 | 1  | 0 | 4.595372 | 1.381903  | 0.928417  |
| 72 | 6  | 0 | 7.493075 | -1.189113 | 0.935435  |
| 73 | 1  | 0 | 5.931945 | -2.680848 | 1.024302  |
| 74 | 6  | 0 | 7.773724 | 0.177704  | 0.891088  |
| 75 | 1  | 0 | 6.944279 | 2.163302  | 0.862510  |
| 76 | 1  | 0 | 8.296863 | -1.906026 | 0.947956  |
| 77 | 9  | 0 | 3.588638 | -0.888155 | 6.331695  |
| 78 | 1  | 0 | 8.795982 | 0.517403  | 0.865359  |
| 79 | 6  | 0 | 3.969556 | -0.825453 | -2.354518 |
| 80 | 1  | 0 | 4.881350 | -0.853012 | -1.767529 |
| 81 | 1  | 0 | 4.163182 | -1.346732 | -3.288213 |
| 82 | 1  | 0 | 3.745256 | 0.217871  | -2.561758 |
| 83 | 1  | 0 | 3.084833 | -2.521503 | -1.374535 |

**Table 19.** Atom coordinates and two energies of **5-a-TS2** (E= -3095.8905 a.u., G= -3096.0103 a.u.)

| Center Number | Atomic Number | Atomic Type | Coordinates (Angstroms) |           |           |
|---------------|---------------|-------------|-------------------------|-----------|-----------|
|               |               |             | X                       | Y         | Z         |
| 1             | 7             | 0           | -0.361385               | -1.844083 | -1.010052 |
| 2             | 6             | 0           | 0.855183                | -1.969404 | -0.399340 |
| 3             | 7             | 0           | 1.603897                | -0.817668 | -0.530180 |
| 4             | 16            | 0           | 1.304527                | -3.334421 | 0.463197  |
| 5             | 1             | 0           | -0.504454               | -1.066161 | -1.635550 |
| 6             | 1             | 0           | 1.062115                | 0.032697  | -0.650474 |
| 7             | 7             | 0           | -3.870135               | -2.213429 | 0.244337  |
| 8             | 6             | 0           | -5.014051               | -2.932066 | -0.390913 |
| 9             | 6             | 0           | -3.377821               | -3.088946 | 1.356222  |
| 10            | 6             | 0           | -4.559383               | -0.584094 | 0.971361  |
| 11            | 6             | 0           | -3.327017               | -0.008122 | 1.767373  |
| 12            | 6             | 0           | -4.925599               | 0.272247  | -0.156735 |
| 13            | 6             | 0           | -5.702600               | -1.105349 | 1.842926  |
| 14            | 7             | 0           | -3.632395               | -0.001819 | 3.242433  |
| 15            | 8             | 0           | -4.324500               | 0.936537  | 3.699700  |
| 16            | 8             | 0           | -3.185964               | -0.949070 | 3.931938  |
| 17            | 6             | 0           | -2.808567               | 1.410120  | 1.364271  |
| 18            | 7             | 0           | -2.526661               | 1.307929  | -0.079727 |

|    |    |   |           |           |           |
|----|----|---|-----------|-----------|-----------|
| 19 | 1  | 0 | -5.709402 | -3.249413 | 0.374082  |
| 20 | 1  | 0 | -4.651456 | -3.814031 | -0.906943 |
| 21 | 1  | 0 | -5.523150 | -2.289745 | -1.093048 |
| 22 | 1  | 0 | -4.180900 | -3.254954 | 2.059713  |
| 23 | 1  | 0 | -2.548933 | -2.646259 | 1.888224  |
| 24 | 1  | 0 | -3.067651 | -4.052249 | 0.963584  |
| 25 | 1  | 0 | -2.484508 | -0.678439 | 1.682308  |
| 26 | 1  | 0 | -5.094353 | 1.295499  | 0.179444  |
| 27 | 1  | 0 | -5.803876 | -0.068079 | -0.697175 |
| 28 | 1  | 0 | -6.114588 | -0.242431 | 2.359975  |
| 29 | 1  | 0 | -5.438623 | -1.838191 | 2.599513  |
| 30 | 1  | 0 | -6.498911 | -1.491136 | 1.219321  |
| 31 | 1  | 0 | -3.455380 | 0.881936  | -0.560644 |
| 32 | 6  | 0 | -1.614452 | 1.823396  | 2.228767  |
| 33 | 1  | 0 | -1.250121 | 2.799748  | 1.924530  |
| 34 | 1  | 0 | -1.916958 | 1.904106  | 3.268070  |
| 35 | 1  | 0 | -0.789865 | 1.123148  | 2.145631  |
| 36 | 1  | 0 | -3.609176 | 2.128566  | 1.519715  |
| 37 | 6  | 0 | 2.945941  | -0.582859 | -0.200359 |
| 38 | 6  | 0 | 3.945182  | -1.561232 | -0.213549 |
| 39 | 6  | 0 | 3.292446  | 0.741024  | 0.102436  |
| 40 | 6  | 0 | 5.257697  | -1.204137 | 0.086949  |
| 41 | 1  | 0 | 3.700339  | -2.578207 | -0.450153 |
| 42 | 6  | 0 | 4.611789  | 1.071732  | 0.386817  |
| 43 | 1  | 0 | 2.523547  | 1.494790  | 0.120533  |
| 44 | 6  | 0 | 5.614580  | 0.105880  | 0.391031  |
| 45 | 1  | 0 | 6.632895  | 0.363804  | 0.619514  |
| 46 | 6  | 0 | 4.965333  | 2.495283  | 0.654454  |
| 47 | 6  | 0 | 6.302107  | -2.270418 | 0.114641  |
| 48 | 9  | 0 | 5.337896  | 3.182504  | -0.497100 |
| 49 | 9  | 0 | 3.912723  | 3.215209  | 1.191738  |
| 50 | 9  | 0 | 6.027161  | 2.625566  | 1.528030  |
| 51 | 9  | 0 | 6.090161  | -3.247560 | -0.839328 |
| 52 | 9  | 0 | 7.572967  | -1.770325 | -0.100835 |
| 53 | 9  | 0 | 6.358635  | -2.936102 | 1.332977  |
| 54 | 8  | 0 | -1.445830 | 1.175367  | -2.257887 |
| 55 | 16 | 0 | -1.279162 | 1.811333  | -0.940927 |
| 56 | 8  | 0 | 0.010743  | 1.534254  | -0.266949 |
| 57 | 6  | 0 | -1.372395 | 3.565676  | -1.130844 |
| 58 | 6  | 0 | -2.461359 | 4.107797  | -1.820234 |
| 59 | 6  | 0 | -0.368433 | 4.380280  | -0.606965 |
| 60 | 6  | 0 | -2.545420 | 5.489128  | -1.978431 |
| 61 | 1  | 0 | -3.219824 | 3.463997  | -2.232828 |
| 62 | 6  | 0 | -0.461995 | 5.764296  | -0.770178 |

|    |   |   |           |           |           |
|----|---|---|-----------|-----------|-----------|
| 63 | 1 | 0 | 0.467482  | 3.940177  | -0.092467 |
| 64 | 6 | 0 | -1.547286 | 6.317558  | -1.452305 |
| 65 | 1 | 0 | -3.377703 | 5.916914  | -2.510805 |
| 66 | 1 | 0 | 0.309531  | 6.400688  | -0.371835 |
| 67 | 1 | 0 | -4.215326 | -1.110223 | -2.211000 |
| 68 | 6 | 0 | -3.253245 | -1.603563 | -2.220961 |
| 69 | 6 | 0 | -2.767192 | -1.837038 | -0.769382 |
| 70 | 6 | 0 | -3.245423 | -2.814991 | -3.165372 |
| 71 | 1 | 0 | -2.576339 | -0.855809 | -2.632509 |
| 72 | 6 | 0 | -1.496199 | -2.738322 | -0.743814 |
| 73 | 1 | 0 | -2.439029 | -0.875372 | -0.413177 |
| 74 | 6 | 0 | -1.894751 | -3.536034 | -3.136107 |
| 75 | 1 | 0 | -4.035770 | -3.523650 | -2.919602 |
| 76 | 1 | 0 | -3.458964 | -2.458887 | -4.172096 |
| 77 | 6 | 0 | -1.538840 | -3.936463 | -1.704186 |
| 78 | 1 | 0 | -1.307044 | -3.127230 | 0.246157  |
| 79 | 1 | 0 | -1.918877 | -4.417980 | -3.773477 |
| 80 | 1 | 0 | -1.118841 | -2.882555 | -3.536225 |
| 81 | 1 | 0 | -0.573573 | -4.432109 | -1.660158 |
| 82 | 1 | 0 | -2.277252 | -4.653886 | -1.335335 |
| 83 | 1 | 0 | -1.615011 | 7.385217  | -1.577996 |

**Table 20.** Atom coordinates and two energies of **5-a-Int3** (E= -3095.9633 a.u., G= -3096.0982 a.u.)

| Center Number | Atomic Number | Atomic Type | Coordinates (Angstroms) |           |           |
|---------------|---------------|-------------|-------------------------|-----------|-----------|
|               |               |             | X                       | Y         | Z         |
| 1             | 7             | 0           | -1.417857               | 0.768664  | -0.812859 |
| 2             | 6             | 0           | -1.148062               | 0.857248  | 0.511511  |
| 3             | 7             | 0           | 0.217457                | 1.038953  | 0.730916  |
| 4             | 16            | 0           | -2.269100               | 0.797962  | 1.757478  |
| 5             | 7             | 0           | -2.594548               | -1.850618 | -1.386169 |
| 6             | 6             | 0           | -2.892703               | -2.992472 | -0.522271 |
| 7             | 6             | 0           | -2.422867               | -2.238952 | -2.785072 |
| 8             | 1             | 0           | -0.626253               | 0.683791  | -1.428867 |
| 9             | 1             | 0           | 0.769703                | 1.236142  | -0.088699 |
| 10            | 1             | 0           | -2.117161               | -3.749262 | -0.630671 |
| 11            | 1             | 0           | -3.853344               | -3.473967 | -0.748837 |
| 12            | 1             | 0           | -2.907724               | -2.673005 | 0.515803  |
| 13            | 1             | 0           | -1.594931               | -2.938878 | -2.868098 |
| 14            | 1             | 0           | -2.179736               | -1.375169 | -3.398031 |
| 15            | 1             | 0           | -3.307717               | -2.721343 | -3.217754 |
| 16            | 6             | 0           | 2.091853                | -2.673499 | -1.852205 |

|    |   |   |           |           |           |
|----|---|---|-----------|-----------|-----------|
| 17 | 6 | 0 | 2.552413  | -1.395427 | -1.167585 |
| 18 | 6 | 0 | 0.873527  | -3.145211 | -1.557796 |
| 19 | 6 | 0 | 3.032808  | -3.349441 | -2.815413 |
| 20 | 7 | 0 | 2.455913  | -0.240222 | -2.146296 |
| 21 | 8 | 0 | 3.233993  | -0.203185 | -3.114792 |
| 22 | 8 | 0 | 1.568258  | 0.631529  | -1.928948 |
| 23 | 1 | 0 | 1.859151  | -1.125511 | -0.380148 |
| 24 | 1 | 0 | 0.194781  | -2.634437 | -0.891810 |
| 25 | 1 | 0 | 0.516587  | -4.060565 | -2.002267 |
| 26 | 1 | 0 | 3.193318  | -3.195196 | 0.348442  |
| 27 | 1 | 0 | 3.934846  | -3.699215 | -2.316179 |
| 28 | 1 | 0 | 3.342796  | -2.671329 | -3.607039 |
| 29 | 1 | 0 | 2.551858  | -4.209177 | -3.271007 |
| 30 | 6 | 0 | 3.989364  | -1.443250 | -0.604445 |
| 31 | 7 | 0 | 3.972370  | -2.556365 | 0.359045  |
| 32 | 6 | 0 | -3.607838 | 1.882126  | -1.239821 |
| 33 | 6 | 0 | -2.726737 | 0.640770  | -1.476348 |
| 34 | 6 | 0 | -4.950952 | 1.773050  | -1.970102 |
| 35 | 6 | 0 | -3.455596 | -0.677454 | -1.136420 |
| 36 | 6 | 0 | -5.684295 | 0.489840  | -1.565389 |
| 37 | 6 | 0 | -4.813578 | -0.735000 | -1.868309 |
| 38 | 1 | 0 | -3.783650 | 1.998766  | -0.175235 |
| 39 | 1 | 0 | -3.060991 | 2.762686  | -1.574235 |
| 40 | 1 | 0 | -2.485193 | 0.619683  | -2.539825 |
| 41 | 1 | 0 | -5.557971 | 2.647932  | -1.742549 |
| 42 | 1 | 0 | -4.792818 | 1.772062  | -3.051291 |
| 43 | 1 | 0 | -3.651069 | -0.661369 | -0.068893 |
| 44 | 1 | 0 | -6.632697 | 0.411422  | -2.095466 |
| 45 | 1 | 0 | -5.916640 | 0.524746  | -0.500012 |
| 46 | 1 | 0 | -5.333593 | -1.649034 | -1.582839 |
| 47 | 1 | 0 | -4.653263 | -0.786576 | -2.946540 |
| 48 | 6 | 0 | 0.909771  | 1.141661  | 1.950367  |
| 49 | 6 | 0 | 1.983218  | 2.035856  | 2.014599  |
| 50 | 6 | 0 | 0.630444  | 0.338581  | 3.062580  |
| 51 | 6 | 0 | 2.768897  | 2.112530  | 3.161730  |
| 52 | 1 | 0 | 2.192038  | 2.677239  | 1.174392  |
| 53 | 6 | 0 | 1.418753  | 0.447262  | 4.205084  |
| 54 | 1 | 0 | -0.190106 | -0.352141 | 3.027379  |
| 55 | 6 | 0 | 2.495079  | 1.326675  | 4.274784  |
| 56 | 1 | 0 | 3.097465  | 1.394076  | 5.161658  |
| 57 | 6 | 0 | 1.097429  | -0.432492 | 5.367543  |
| 58 | 6 | 0 | 3.949883  | 3.022165  | 3.164373  |
| 59 | 9 | 0 | -0.145087 | -0.175103 | 5.915091  |
| 60 | 9 | 0 | 1.079565  | -1.778483 | 5.017559  |



|    |    |   |          |           |           |
|----|----|---|----------|-----------|-----------|
| 61 | 9  | 0 | 3.704850 | 4.215898  | 2.512524  |
| 62 | 9  | 0 | 4.384669 | 3.333747  | 4.434222  |
| 63 | 9  | 0 | 5.047506 | 2.461030  | 2.510739  |
| 64 | 8  | 0 | 6.468278 | -2.714493 | 0.340129  |
| 65 | 16 | 0 | 5.307728 | -3.144191 | 1.118376  |
| 66 | 8  | 0 | 5.008279 | -4.555938 | 1.347296  |
| 67 | 6  | 0 | 5.396235 | -2.345578 | 2.693290  |
| 68 | 6  | 0 | 6.351465 | -1.353054 | 2.912868  |
| 69 | 6  | 0 | 4.513028 | -2.738829 | 3.702920  |
| 70 | 6  | 0 | 6.409400 | -0.729867 | 4.160795  |
| 71 | 1  | 0 | 7.043013 | -1.088898 | 2.132051  |
| 72 | 6  | 0 | 4.575592 | -2.109322 | 4.944250  |
| 73 | 1  | 0 | 3.804492 | -3.530188 | 3.529254  |
| 74 | 6  | 0 | 5.522219 | -1.104362 | 5.172404  |
| 75 | 1  | 0 | 7.143153 | 0.037091  | 4.339848  |
| 76 | 1  | 0 | 3.899231 | -2.404101 | 5.727508  |
| 77 | 9  | 0 | 2.012171 | -0.313543 | 6.395799  |
| 78 | 1  | 0 | 5.571268 | -0.624462 | 6.135681  |
| 79 | 6  | 0 | 4.393624 | -0.119253 | 0.044556  |
| 80 | 1  | 0 | 4.365921 | 0.694032  | -0.677087 |
| 81 | 1  | 0 | 3.743038 | 0.120140  | 0.880562  |
| 82 | 1  | 0 | 5.411829 | -0.176673 | 0.410604  |
| 83 | 1  | 0 | 4.680873 | -1.665456 | -1.412907 |

---
